# Supplementary material for: Adaptation and validation of the Chinese version of the Hospice Comfort Questionnaire-Patient (HCQ-P)
Source: PeerJ. 2025 Jun 10;13:e19562. doi: 10.7717/peerj.19562 (PMC12164812; doi:10.7717/peerj.19562)
Supplement: Supplemental Information 1 [file peerj-13-19562-s001.xlsx]

## Sheet: Data
id	sex	year	edu	marry	cons	diag-eng	long	oper	chem	radio	lied	work	Q1	Q2	Q5	Q12	Q14	Q16	Q19	Q27	Q29	Q31	Q34	Q3	Q7	Q9	Q15	Q17	Q22	Q35	Q36	Q39	Q40	Q41	Q43	Q45	Q46	Q11	Q18	Q21	Q25	Q30	Q32	Q33	Q38	Q42	Q49	Q4	Q6
1	0	70	1	1	1	Adenocarcinoma of the colon	25	1	1	1	0	3	2	4	6	2	1	3	6	2	4	2	4	4	6	6	5	6	6	5	4	3	6	2	6	6	6	2	1	6	1	6	3	4	4	6	5	5	5
2	1	42	3	3	4	Nasopharyngeal Carcinoma	8	1	1	1	1	1	6	6	6	6	6	6	6	1	6	1	6	6	6	6	6	6	6	6	6	1	6	6	6	6	1	6	6	6	1	6	6	6	6	6	6	6	1
3	1	58	3	1	1	Malignant tumour of the hypopharynx	16	1	1	1	0	3	3	4	5	2	4	4	4	3	5	3	5	3	1	6	5	6	3	5	6	1	6	2	6	6	6	4	2	6	1	4	3	1	3	5	4	6	4
4	0	37	3	1	1	Nasopharyngeal cancer	14	1	1	1	0	2	5	6	1	6	5	6	4	1	4	5	4	1	6	6	6	6	6	6	6	3	5	6	6	6	6	6	1	6	3	4	4	4	5	3	4	6	6
5	1	66	1	1	1	lung cancer	7	0	1	1	0	3	3	3	6	4	3	1	6	6	6	2	5	5	1	6	2	6	2	6	6	1	6	1	6	6	6	1	1	6	1	3	6	2	6	4	4	6	2
6	0	73	1	1	3	Malignant tumours of the lungs	240	1	1	1	0	3	5	5	5	2	6	2	4	5	5	1	4	4	1	6	2	5	3	5	6	3	4	2	6	6	6	2	1	6	1	5	5	2	4	4	6	6	5
7	1	61	2	1	1	Left hilar lung	10	0	1	1	0	3	3	2	5	2	4	3	5	5	5	2	5	3	1	6	1	6	4	6	6	2	6	1	6	5	5	1	1	5	1	5	2	1	3	3	4	5	1
8	1	85	4	1	2	heart failure	24	0	0	0	1	2	1	6	6	1	4	6	4	4	3	1	4	6	6	6	1	6	3	6	3	1	4	3	4	4	6	3	6	6	1	4	3	3	6	3	5	6	1
9	0	53	3	3	1	Malignant tumour of the rectum	72	1	1	1	1	2	5	6	5	6	3	3	3	2	5	2	6	3	1	3	4	6	2	5	6	1	2	2	5	6	2	5	3	5	1	4	3	2	3	3	4	6	1
10	0	69	2	4	3	Malignant tumour of the rectum	68	1	1	1	1	2	3	6	1	6	3	1	6	6	6	3	6	6	6	6	6	6	6	6	6	1	6	5	6	6	6	6	3	4	1	5	2	5	6	2	6	6	6
11	0	64	2	3	1	Malignant tumour of the rectum	53	1	1	0	1	3	4	2	3	3	3	5	3	3	4	4	2	1	4	1	3	3	3	4	4	3	3	5	3	4	4	5	5	5	1	3	3	5	3	5	4	5	1
12	0	46	3	1	1	breast cancer	26	1	1	0	1	1	5	6	5	5	6	5	5	5	5	3	6	6	5	5	5	6	6	5	6	1	5	3	6	5	3	5	4	6	1	5	5	5	6	6	6	6	1
13	0	65	1	1	1	Malignant tumours of the oesophagus	6	0	0	0	1	3	2	2	2	2	3	2	6	1	5	2	5	1	4	6	3	6	2	6	6	1	4	4	6	6	6	2	1	6	1	3	5	4	6	6	6	5	6
14	0	89	1	1	1	Malignant tumours of the lungs	24	0	0	1	0	3	6	5	4	6	4	6	6	5	4	2	2	6	2	5	5	4	5	3	6	2	5	6	4	3	6	4	6	3	4	2	3	6	3	5	4	5	3
15	0	75	1	1	1	Malignant tumour of the stomach	9	1	0	0	1	3	6	6	6	3	1	5	3	1	6	6	6	6	5	5	6	6	5	6	6	1	5	6	5	6	6	3	4	6	1	5	1	6	6	6	6	6	5
16	0	63	2	1	1	breast cancer	24	1	1	0	1	3	3	4	4	5	2	4	4	4	2	2	4	3	2	4	3	4	6	2	2	2	4	3	6	5	3	3	2	5	4	5	4	1	3	4	4	5	4
17	0	75	1	1	3	oral cancer	86	1	0	1	1	3	5	6	3	4	2	5	6	2	3	4	3	5	6	2	6	6	6	5	6	6	6	1	5	5	5	2	3	6	1	6	3	3	6	3	1	6	4
18	0	90	1	4	1	Malignant tumour of the stomach	19	0	0	0	0	3	6	6	6	6	2	5	3	6	1	3	2	2	3	6	1	6	1	1	6	5	4	1	6	6	6	1	1	2	1	5	5	4	6	6	2	6	1
19	1	70	2	1	1	Malignant tumours of the oesophagus	108	1	1	1	1	1	6	6	5	2	1	3	2	2	1	6	6	6	1	6	6	6	4	3	6	1	3	1	2	4	6	6	1	6	1	5	3	6	6	6	6	1	1
20	0	69	3	1	1	pain	83	0	0	0	0	3	6	5	6	6	4	6	3	3	5	3	5	4	3	6	6	5	2	5	6	1	3	1	5	4	3	5	2	4	1	3	2	2	3	3	4	6	3
21	1	66	2	1	1	Malignant tumour of the pancreas	7	1	1	0	0	3	4	6	5	6	4	4	2	3	5	3	4	4	1	6	4	3	3	6	6	1	3	1	3	4	3	3	1	3	2	2	3	1	2	3	4	5	3
22	0	78	3	1	2	Malignant tumour of the ovary	55	1	1	0	1	2	5	6	6	6	5	5	5	4	5	4	4	6	1	6	6	4	2	6	6	1	5	1	3	5	5	4	1	3	1	1	2	2	1	3	5	6	3
23	1	69	3	1	1	bladder cancer	38	1	1	0	0	2	6	6	6	6	4	6	6	3	4	4	6	6	4	6	4	3	3	6	6	1	3	2	6	6	4	5	3	5	1	5	3	3	4	3	4	6	1
24	1	75	2	1	3	Chronic Resistance Lung	71	1	0	0	1	1	2	1	6	3	5	1	6	6	6	3	4	6	2	5	3	6	6	6	6	1	2	2	6	6	6	5	5	6	3	6	5	4	6	5	6	6	6
25	0	75	3	3	1	Malignant tumours of the oesophagus	240	1	1	1	1	2	4	6	6	3	6	5	6	3	5	5	2	4	1	5	5	4	6	5	6	1	4	4	3	3	4	4	1	6	1	4	5	3	3	3	5	4	5
26	0	49	3	1	1	Nasty tumours of the lungs, pleura, ribs	14	1	1	1	1	2	6	6	6	6	6	6	6	6	6	6	6	6	1	6	6	6	6	6	6	1	6	6	6	6	6	6	6	6	1	6	6	6	6	6	6	6	6
27	1	19	2	2	1	Malignant tumour of the pleura	15	1	1	1	0	5	6	6	6	6	6	6	6	6	6	3	6	3	1	6	6	6	6	6	6	1	6	6	6	6	6	6	3	6	1	6	4	4	4	4	4	6	6
28	1	71	2	1	1	Malignant tumour of the larynx	108	1	1	1	1	1	6	1	6	5	6	2	5	5	3	3	5	6	1	6	3	5	5	4	3	2	5	3	3	5	3	4	2	6	4	5	4	3	4	3	3	5	4
29	0	86	1	4	3	Malignant tumour of the liver	3	0	0	0	0	4	6	6	6	6	6	6	6	6	6	6	6	6	1	6	6	6	6	6	6	1	6	6	6	6	6	6	6	6	1	6	6	6	6	6	6	6	6
30	0	53	2	1	1	Malignant tumours of the uterine cervix	24	1	1	0	0	3	6	6	6	6	6	6	6	6	2	5	5	6	1	6	6	6	6	6	6	1	5	6	6	6	6	6	5	6	1	5	6	6	6	6	6	6	6
31	0	74	1	1	1	oral cancer	14	0	1	1	0	4	4	5	6	4	4	3	5	5	2	2	5	2	1	6	3	5	5	2	2	5	5	3	5	5	2	3	2	6	5	5	5	2	5	2	2	2	5
32	1	19	2	2	1	Malignant tumour of bone secondary to lung	36	1	1	1	0	5	4	5	4	2	4	4	3	6	5	3	3	4	1	6	5	6	4	4	6	1	3	4	6	5	6	6	2	4	1	4	6	6	5	6	6	6	2
33	0	67	2	1	2	Malignant tumours of the oesophagus	12	1	1	0	0	4	1	6	6	2	4	4	6	6	5	3	3	4	1	4	6	3	3	4	6	1	3	3	3	6	5	6	2	5	1	4	6	6	3	6	6	4	1
34	0	50	1	3	1	Nasopharyngeal cancer lung metastasis	68	1	1	1	1	1	6	6	6	6	6	6	6	6	6	6	6	6	1	6	6	6	6	6	6	1	1	6	6	6	6	6	6	6	1	6	6	6	6	6	6	6	3
35	0	66	2	1	3	Malignant tumour of the gums	62	1	1	1	0	1	3	6	3	3	5	5	3	6	4	3	2	4	1	6	5	3	3	5	6	1	3	4	6	6	6	4	3	5	1	4	6	6	6	6	6	6	2
36	0	66	1	1	1	Malignant tumour of the ovary	60	1	1	0	0	4	6	6	6	6	6	6	6	1	1	6	6	6	6	6	6	6	6	6	6	1	6	6	6	6	6	6	6	6	1	6	6	6	6	6	6	6	1
37	0	69	2	1	3	Malignant tumour of the tongue	72	0	0	0	1	1	6	6	6	6	6	6	6	6	1	6	6	6	6	6	6	6	6	6	6	1	6	6	6	6	6	6	6	6	1	6	1	6	6	6	6	6	1
38	0	67	1	1	2	Mediastinal metastasis from a malignant tumour of the lung	26	0	1	1	0	4	6	6	6	6	6	6	6	5	6	6	6	2	6	6	6	6	5	6	6	3	6	2	6	6	6	6	6	6	1	6	6	6	6	6	6	6	2
39	1	75	3	1	3	Malignant tumour of the colon	28	1	1	0	0	2	6	6	6	6	6	6	6	6	1	6	6	4	5	6	6	6	6	6	6	2	6	1	6	6	6	6	6	6	1	6	6	6	6	6	6	6	2
40	1	76	4	1	2	Mediastinal metastasis from a malignant tumour of the lung	33	1	1	0	1	1	6	6	6	6	6	6	6	6	6	6	6	1	6	6	6	6	6	6	6	1	6	6	6	6	6	6	6	6	1	6	6	6	6	6	6	6	1
41	0	52	3	1	2	Malignant tumour of the nasopharynx	24	0	1	0	0	2	6	6	6	6	6	6	6	6	6	2	6	1	1	6	6	6	6	6	6	1	6	1	6	6	3	6	1	6	1	6	6	6	6	6	6	6	4
42	0	70	2	4	2	Malignant tumour of the nasopharynx	4	1	0	1	0	2	6	6	6	6	6	6	6	6	1	5	6	5	1	6	6	6	6	6	6	2	6	1	6	6	6	6	2	6	1	6	6	5	6	5	6	6	2
43	1	43	3	4	2	Malignant tumour of the nasopharynx	6	1	0	1	0	5	6	6	6	6	6	6	6	6	6	6	6	6	6	6	6	6	6	6	6	1	6	6	6	6	6	6	3	6	4	6	6	6	6	6	6	6	6
44	1	55	3	1	3	Mediastinal metastasis from a malignant tumour of the lung	6	0	1	0	1	1	6	6	6	6	6	6	6	6	1	6	6	1	4	6	6	6	6	6	6	3	6	1	6	6	6	6	6	6	6	6	6	6	6	6	6	6	3
45	1	55	2	1	1	Mediastinal metastasis from a malignant tumour of the lung	8	0	1	0	1	4	6	1	6	6	6	6	6	6	6	6	6	6	6	6	6	6	6	6	6	1	6	6	6	6	6	6	6	6	1	6	6	6	6	6	6	6	6
46	1	61	2	1	3	Mediastinal metastasis from a malignant tumour of the lung	12	0	1	0	0	2	3	2	3	3	1	1	1	1	1	4	3	6	1	4	1	3	1	4	4	3	3	4	3	3	4	6	4	1	3	3	3	4	3	4	4	6	1
47	1	60	3	1	2	Malignant tumour of the colon	36	1	1	0	0	1	6	1	1	1	1	6	1	1	6	6	1	6	6	6	6	1	1	6	6	1	1	6	1	1	6	6	6	1	1	1	1	6	1	6	6	6	1
48	1	64	2	1	1	Malignant tumour of the colon	22	0	1	0	0	4	5	5	2	3	3	4	3	3	4	4	5	5	5	4	4	3	3	4	4	2	5	5	5	5	4	4	4	3	3	3	3	4	3	5	5	5	2
49	1	66	3	1	2	Malignant tumours of the lungs Malignant tumours of the rectum	4	0	0	0	1	3	6	6	6	6	6	6	6	6	1	6	6	3	1	6	6	6	6	6	6	2	6	1	6	6	6	6	5	6	1	6	6	6	6	6	6	6	2
50	1	66	2	1	2	Malignant tumour of the colon	48	1	1	1	1	2	3	5	6	6	1	6	6	5	2	6	1	3	6	1	6	6	1	1	2	1	1	3	4	4	3	6	6	6	1	5	6	1	4	3	6	6	6
51	0	70	1	4	2	Malignant tumour of the colon	27	0	1	0	0	5	3	4	4	4	4	3	4	4	3	3	4	3	3	3	3	4	4	3	3	4	4	3	4	4	3	3	3	4	4	4	4	3	4	3	3	3	4
52	0	58	2	1	2	Malignant tumours of the lungs	7	0	1	0	0	3	5	4	3	4	5	5	4	3	4	4	4	3	3	6	2	3	5	4	2	4	5	3	4	4	4	6	3	4	4	5	6	3	4	3	5	4	3
53	1	71	2	1	1	Multiple metastases from lung occupations	5	0	1	0	0	3	6	1	1	1	1	6	1	1	6	6	1	6	6	6	6	1	1	6	6	1	1	6	1	1	6	6	6	1	1	1	1	6	1	6	6	6	1
54	1	69	2	1	2	Malignant tumour of the kidney	336	1	1	1	1	2	6	6	6	6	6	6	6	6	6	6	6	6	1	6	6	6	6	6	6	2	6	1	6	6	6	6	6	6	1	6	6	6	6	6	6	6	2
55	0	60	2	3	1	Malignant tumour of the ovary	108	1	1	0	1	2	6	6	5	6	6	6	6	6	4	6	6	6	6	6	6	6	6	4	6	6	6	4	6	6	6	6	6	6	1	6	6	6	6	6	6	4	2
56	0	63	3	2	1	Malignant tumour of the ovary	48	1	1	0	0	2	6	1	6	6	6	5	6	6	6	6	6	6	6	6	5	6	6	6	5	1	6	3	6	6	6	6	5	6	1	6	6	6	6	6	6	6	6
57	0	36	3	2	1	breast cancer	6	1	1	0	1	5	6	5	6	6	6	6	6	4	6	4	6	6	6	6	6	6	6	6	6	4	6	3	6	6	6	6	6	6	1	6	6	6	6	3	6	6	6
58	0	52	2	3	2	Malignant tumours of the uterine cervix	24	1	1	0	0	1	6	6	6	6	6	6	6	1	6	6	6	6	6	6	6	6	6	6	6	1	6	6	6	6	6	6	1	6	1	6	6	6	6	6	6	6	1
59	0	46	3	1	1	Malignant tumours of the uterine cervix	6	1	1	0	1	1	6	6	6	1	6	6	6	6	6	6	6	6	6	6	6	6	6	6	6	1	6	6	6	6	6	6	6	6	1	6	6	6	6	6	6	6	6
60	1	56	2	1	1	Non-Hodgkin's lymphoma	12	1	1	0	0	3	6	6	6	6	6	6	6	6	6	6	6	6	6	6	6	6	6	6	6	1	6	6	6	6	6	6	6	6	1	6	6	6	6	6	6	6	1
61	0	68	1	1	2	acute myeloid leukaemia	12	0	1	0	0	5	4	6	6	6	6	6	6	2	6	6	6	6	6	6	6	6	6	6	6	1	6	6	6	6	6	6	6	6	1	6	6	6	6	6	6	5	5
62	1	72	1	1	1	Malignant tumour of the sigmoid colon	48	1	1	0	0	4	6	6	6	6	6	6	6	4	3	3	4	6	6	6	6	6	6	3	3	4	4	3	4	4	3	6	3	6	4	4	4	3	4	3	3	6	6
63	1	65	1	1	2	Malignant tumour of the colon	36	1	1	0	0	3	5	5	5	5	6	5	5	4	4	5	5	5	2	5	5	5	5	4	5	3	6	5	5	5	5	5	4	5	2	5	5	4	4	5	3	5	5
64	1	60	1	1	1	malignant lymphoma	13	0	1	0	1	3	4	1	2	2	2	6	3	1	5	4	3	5	5	5	5	3	1	5	5	2	2	4	2	3	4	5	4	3	2	3	3	4	3	5	5	5	2
65	1	64	1	4	1	Malignant tumour of the liver	8	0	1	0	0	4	6	1	1	1	1	6	1	1	6	6	1	6	6	6	6	1	1	6	6	1	1	6	1	1	6	6	6	1	1	1	1	6	1	6	6	6	1
66	1	64	1	1	1	Malignant tumour of the rectum	8	0	1	0	0	1	6	6	6	6	6	1	6	5	6	6	6	6	6	6	6	6	6	6	6	1	6	6	6	6	5	6	5	6	1	6	6	6	6	6	6	6	6
67	1	64	2	1	2	Malignant tumours of the lungs	5	0	1	0	1	3	6	1	6	6	6	6	6	6	6	6	6	6	6	6	6	6	6	6	6	1	6	6	6	6	6	6	4	6	6	6	6	6	6	6	6	6	6
68	1	64	2	1	2	Malignant tumour of the colon	60	1	1	0	0	3	6	2	6	6	6	6	6	5	6	6	6	5	6	6	6	6	6	6	6	1	6	2	6	6	5	6	5	6	1	6	6	6	6	6	5	4	5
69	0	45	3	1	4	Malignant tumour of the thyroid gland	36	1	1	0	1	4	3	6	6	6	6	5	6	4	6	4	5	6	3	6	6	6	6	5	6	1	5	5	5	2	5	6	6	6	1	6	3	4	6	6	5	6	6
70	0	71	1	4	4	advanced ovarian cancer	48	1	1	0	1	4	6	6	6	6	6	6	6	6	6	6	6	6	6	6	6	6	6	6	6	1	6	6	6	6	6	6	6	6	1	6	6	6	6	6	6	6	6
71	0	59	2	1	1	Malignant tumour of fallopian tube	61	1	1	0	0	3	5	6	6	6	6	4	6	6	3	5	6	4	4	5	5	6	6	4	4	2	6	5	6	6	4	5	4	6	2	6	6	4	6	5	4	5	6
72	0	53	2	1	1	Cervical Cancer Surgery	24	1	1	0	0	3	3	4	5	3	2	4	2	5	2	4	3	1	2	2	2	5	2	2	4	5	3	2	5	5	4	2	5	5	2	5	5	5	3	4	2	4	3
73	0	62	2	1	1	Malignant tumour of the ovary	53	1	1	0	0	3	6	1	6	6	6	6	6	6	6	6	1	6	6	6	6	6	6	6	6	1	6	4	6	6	6	6	6	6	1	6	6	6	6	6	6	6	6
74	0	65	1	1	3	Malignant tumours of the uterine cervix	36	0	1	0	0	3	5	3	4	3	4	4	4	3	2	2	3	4	4	2	4	4	3	4	5	2	4	4	4	4	3	4	5	5	4	5	5	4	3	5	4	2	3
75	0	53	2	1	2	Malignant tumour of the ovary	36	1	1	0	0	2	6	6	6	6	6	6	6	6	6	6	6	6	1	6	6	6	6	6	6	1	6	6	6	6	6	6	6	6	1	6	6	6	6	6	6	6	6
76	1	59	2	1	4	acute leukaemia	6	0	1	0	0	4	6	4	4	4	4	3	4	3	3	3	4	5	3	5	3	4	5	3	3	4	4	3	4	5	3	5	2	5	4	4	4	3	4	3	3	2	2
77	1	68	2	1	1	multiple myeloma	84	0	1	0	0	3	6	6	6	6	6	6	6	6	6	6	6	6	6	6	6	6	6	6	6	1	6	6	6	6	6	6	6	6	1	6	6	6	6	6	6	6	1
78	1	70	4	1	2	leukaemia	7	0	1	0	0	2	6	1	5	1	5	6	5	6	5	5	6	6	6	6	6	6	6	5	6	2	5	4	5	5	4	6	2	6	1	6	5	5	5	3	5	6	6
79	1	77	3	1	1	Non-Hodgkin's lymphoma	12	0	1	0	0	3	6	6	6	1	6	5	6	4	6	3	6	2	1	3	4	6	4	5	4	4	4	3	4	4	3	6	1	6	1	6	6	5	4	3	3	2	6
80	1	52	3	1	2	Hodgkin's lymphoma	7	0	1	0	0	2	5	4	3	3	3	4	3	3	2	4	3	3	4	3	4	4	5	3	4	3	3	3	4	5	4	4	3	3	3	4	3	2	4	5	3	4	3
81	1	53	3	1	3	multiple myeloma	5	0	1	0	0	5	6	6	6	6	6	6	6	5	5	6	6	4	4	6	5	6	6	5	5	4	6	4	6	6	4	6	5	6	1	6	6	6	6	6	6	4	5
82	1	50	4	1	1	Non-Hodgkin's lymphoma	5	0	1	0	0	3	3	4	4	5	6	3	4	2	3	3	4	3	4	3	3	5	4	3	3	5	5	1	5	5	2	3	4	4	4	4	4	3	4	3	3	4	4
83	0	28	3	2	2	acute myeloid leukaemia	6	0	1	0	0	2	6	1	6	6	6	6	6	4	3	3	4	6	1	6	6	6	4	3	3	4	4	3	4	4	3	6	1	4	4	4	4	3	4	3	3	6	6
84	1	45	4	1	1	lymphomas	12	0	1	0	0	3	6	3	1	3	1	3	1	1	6	4	4	3	3	3	6	1	1	6	4	4	2	6	4	1	4	6	3	1	2	3	1	3	3	4	6	6	3
85	1	59	1	1	3	multiple myeloma	8	0	1	0	0	5	6	2	2	2	3	6	3	2	5	5	2	4	3	5	4	2	2	5	4	2	4	4	2	2	4	6	4	1	2	3	2	4	3	4	5	4	2
86	1	48	3	1	1	multiple myeloma	5	0	1	0	0	3	4	6	6	6	6	6	1	6	1	1	3	6	6	6	6	6	1	4	4	3	3	4	3	3	4	1	1	1	1	1	3	4	3	4	5	6	6
87	1	95	1	4	4	Malignant tumours of the lungs	9	0	0	0	0	1	6	6	6	6	6	6	6	6	5	5	6	6	6	6	6	6	6	6	5	1	6	4	6	6	5	6	3	6	2	6	6	6	6	6	5	6	6
88	1	105	1	1	2	Malignant tumour of the colon	13	0	1	0	0	1	5	6	6	6	6	6	6	5	1	4	6	4	5	6	6	6	6	5	5	2	6	3	6	6	5	6	6	6	1	6	5	5	6	6	6	5	6
89	0	72	1	4	2	Malignant tumour of the tonsils	12	1	1	0	0	3	5	6	6	6	6	5	6	5	6	4	6	5	5	6	6	6	6	5	1	3	6	3	6	6	4	6	4	6	1	6	6	6	4	6	6	5	5
90	0	71	2	1	4	Malignant tumours of the lungs	8	0	1	0	0	4	3	3	5	5	4	2	3	4	3	3	4	3	4	3	2	4	3	3	3	4	4	3	5	4	3	3	3	4	3	4	4	3	4	4	3	5	5
91	0	86	1	4	2	breast cancer	60	1	1	0	1	4	5	2	4	4	5	5	5	4	4	4	4	5	6	6	5	3	4	5	5	3	5	6	6	5	6	6	3	6	2	4	5	5	5	5	6	5	1
92	0	43	3	1	2	breast cancer	24	1	1	1	0	3	6	6	6	6	6	6	6	6	3	4	4	6	6	6	6	6	2	5	3	1	6	2	6	6	6	6	6	6	1	6	6	6	6	6	6	6	5
93	1	69	2	1	3	Malignant tumour of the larynx	13	1	1	1	0	5	5	5	5	4	4	4	4	4	4	4	4	3	3	5	4	3	3	4	5	3	5	5	4	5	4	5	3	5	2	3	3	2	5	5	4	4	4
94	1	52	3	1	1	Malignant tumour of the hypopharynx	11	1	0	1	1	2	3	4	4	4	4	3	4	3	4	4	3	3	3	3	3	4	4	4	4	3	3	4	3	3	4	3	3	4	3	3	3	4	3	4	4	3	4
95	0	19	1	2	1	Malignant tumours of the brain	24	1	1	0	0	5	4	3	3	3	3	4	3	4	3	3	4	4	4	4	4	3	3	3	3	3	4	3	3	3	4	4	4	3	4	4	4	3	4	4	4	4	3
96	0	19	1	2	1	Malignant tumour of the brain	20	1	0	1	0	5	6	6	6	6	6	6	6	6	6	6	6	6	6	6	6	6	6	6	6	1	6	6	6	6	6	6	6	6	1	6	6	6	6	6	6	6	1
97	0	64	1	1	3	Malignant tumours of the lungs	11	1	1	0	0	4	5	6	4	4	3	4	5	4	4	4	3	3	4	4	4	5	3	3	4	1	5	3	3	4	2	4	1	4	5	5	4	4	4	5	4	3	3
98	0	67	2	1	2	Malignant tumour of the mediastinum of the lung	28	1	1	0	0	3	6	6	6	6	6	6	6	6	6	6	6	6	6	6	6	6	6	6	6	1	6	6	6	6	6	6	6	6	1	6	6	6	6	6	6	6	1
99	0	59	2	1	1	Malignant tumours of the lungs	14	1	1	0	0	3	6	1	1	6	6	6	6	5	6	6	6	6	6	6	6	6	6	6	6	1	6	6	6	6	6	6	6	6	1	6	6	6	6	6	6	6	1
100	1	55	3	1	2	Malignant tumours of the lungs	9	0	1	0	0	1	6	6	6	6	5	6	6	5	3	6	1	5	5	6	5	6	6	5	5	1	6	4	6	6	3	6	4	6	1	6	5	4	6	6	6	6	6
101	0	52	2	1	3	Malignant tumour of the nasopharynx	24	0	0	1	0	3	6	1	1	1	1	6	1	1	6	6	1	6	6	6	6	1	1	6	6	1	2	6	1	1	6	6	6	1	1	1	1	6	1	6	6	6	1
102	0	62	3	1	1	Malignant tumour of the ovary	70	1	1	0	0	3	6	6	6	6	6	6	5	3	6	6	5	6	6	6	6	5	6	6	2	1	5	6	5	5	5	6	6	6	1	5	5	6	5	6	6	6	6
103	0	67	1	1	1	breast cancer	48	1	1	0	0	5	6	6	6	6	6	6	6	6	6	6	6	6	6	6	6	6	6	6	6	1	6	6	6	6	6	6	6	6	1	6	6	6	6	6	6	6	6
104	1	62	1	1	3	Malignant tumours of the external auditory canal of the skin	7	1	1	0	1	4	4	4	4	3	4	3	3	3	4	4	3	3	4	3	3	3	3	4	4	3	3	4	3	3	4	3	4	3	3	3	3	4	3	4	4	3	4
105	1	60	3	1	1	Malignant tumour of the stomach	12	1	1	0	1	3	6	5	6	5	6	2	4	5	4	4	4	6	6	6	6	6	3	6	6	1	6	6	4	5	5	6	1	3	3	3	3	4	1	4	6	6	6
106	1	54	1	1	1	Malignant tumours of the lungs	10	0	1	0	0	5	6	6	6	6	6	6	6	3	5	5	6	6	6	6	6	6	6	6	5	4	6	6	5	6	6	6	5	6	1	6	6	6	6	6	6	6	4
107	0	51	1	1	1	Malignant tumour of the pancreas	6	0	1	0	0	5	3	4	5	4	5	3	5	5	3	2	5	4	2	2	2	5	5	2	3	3	5	3	4	4	3	2	2	4	5	5	5	3	4	2	3	4	2
108	1	77	1	1	3	Malignant tumour of the stomach	10	0	1	0	1	4	4	3	3	3	3	4	3	3	4	3	4	4	4	4	4	3	3	3	3	3	3	3	3	3	4	4	4	3	3	4	4	3	3	4	4	4	3
109	1	53	2	3	1	Malignant tumour of the kidney	48	1	0	0	1	3	6	1	1	1	1	6	1	1	6	6	1	6	6	6	6	1	1	6	6	1	1	6	1	1	6	6	6	1	1	1	1	6	1	6	6	6	1
110	1	68	1	1	1	Malignant tumours of the oesophagus	24	1	1	0	0	3	6	6	6	6	4	6	6	5	5	6	5	6	6	6	5	6	6	6	6	1	6	6	5	5	6	6	3	1	1	5	5	6	5	6	6	6	6
111	0	79	1	1	1	Colonic Ca pain	24	1	1	0	0	4	3	3	4	4	4	3	4	4	3	3	5	4	3	3	4	4	4	3	3	4	4	2	4	4	3	3	3	4	5	5	5	3	4	3	3	3	3
112	1	68	3	1	1	Malignant tumours of the lungs	72	1	1	0	0	2	6	1	1	1	1	6	1	1	6	6	1	6	6	6	6	1	1	6	6	1	1	6	1	1	5	6	6	1	1	1	2	6	1	6	5	6	1
113	1	63	3	3	1	Malignant tumour of the rectum	7	0	1	0	0	3	3	4	2	3	4	2	4	4	4	5	2	1	1	3	4	5	4	3	3	3	3	1	3	4	3	3	3	4	4	2	2	1	2	1	1	2	4
114	1	70	1	4	3	Malignant tumour of the hypopharynx	7	0	1	0	0	4	4	3	3	3	3	4	3	3	4	4	3	4	4	4	4	3	3	4	4	4	3	4	3	3	3	4	4	3	3	3	3	4	3	3	4	4	3
115	1	53	3	1	2	Malignant tumour of the hypopharynx	7	0	1	1	0	1	5	5	5	5	5	5	6	2	5	5	5	5	5	5	5	5	6	5	5	5	6	4	5	6	5	5	3	6	2	5	4	4	4	4	5	6	5
116	0	64	3	1	2	Malignant tumours of the lungs	13	0	1	0	1	3	5	6	5	5	5	1	6	1	1	6	6	6	6	6	6	6	1	6	6	1	6	1	6	6	6	6	6	6	1	6	6	6	6	6	6	6	5
117	0	36	3	1	3	breast cancer	60	1	1	0	1	3	6	6	6	6	6	6	6	6	1	6	6	6	6	6	6	6	6	6	6	6	6	1	6	6	6	6	6	6	1	6	6	6	6	6	6	6	6
118	0	64	2	1	1	Malignant tumour of the colon	18	1	1	0	0	4	4	3	3	3	3	4	3	3	4	4	3	4	4	4	4	3	3	4	4	3	3	4	3	3	4	4	4	3	3	3	3	4	3	4	4	4	3
119	0	75	3	1	1	oral cancer	5	0	0	1	0	2	6	4	4	5	5	4	6	5	4	4	5	6	6	6	5	5	5	4	4	5	5	4	5	5	4	4	3	5	3	4	3	4	6	2	2	6	5
120	0	76	1	1	3	Malignant tumours of the lungs	10	0	1	0	0	4	6	3	4	6	6	6	1	1	6	6	1	6	6	6	6	6	6	6	6	4	5	2	1	6	4	6	1	6	1	1	6	3	1	4	4	6	1
121	0	67	1	1	4	Malignant tumours of the oesophagus	8	0	1	1	0	4	6	6	5	4	4	3	3	3	3	3	4	6	6	6	3	6	2	3	3	3	3	6	3	3	4	6	4	3	1	4	4	3	3	5	4	6	1
122	1	57	1	1	3	Malignant tumour of the stomach	24	1	1	1	0	4	1	2	1	1	1	6	1	1	2	1	1	6	1	6	6	6	1	3	4	1	1	1	1	1	1	6	1	1	1	1	1	2	1	6	6	6	1
123	1	71	2	1	3	Colonic liver secondary	32	0	1	1	0	4	3	3	6	6	6	3	6	6	3	2	6	1	3	3	4	6	1	6	6	1	6	2	6	6	2	4	1	6	1	6	6	3	6	6	6	3	4
124	0	61	4	3	2	breast cancer	60	1	1	1	1	1	6	6	6	6	6	6	6	6	6	6	6	6	6	6	6	6	6	6	6	3	6	6	6	6	6	6	5	6	1	6	6	6	6	6	6	6	6
125	0	76	3	1	2	Malignant tumour of the liver	12	0	1	0	1	2	4	3	3	3	3	4	3	3	4	4	3	4	4	4	4	3	3	4	4	3	3	4	3	3	4	4	4	3	3	3	3	4	3	4	4	4	3
126	1	65	3	1	1	Malignant tumours of the lungs	12	1	1	0	0	2	6	6	6	1	1	6	6	4	4	6	6	6	6	6	6	6	6	4	6	2	6	4	3	6	6	6	6	6	1	6	4	6	6	6	6	6	1
127	1	55	3	1	1	Malignant tumours of the lungs	8	0	1	1	0	2	3	4	3	4	4	3	4	3	3	3	3	4	4	4	3	4	4	4	4	3	4	4	3	3	3	4	4	4	4	3	3	3	4	3	4	3	4
128	0	74	4	1	2	lung cancer	14	1	1	1	0	2	6	6	6	6	4	6	6	6	6	2	3	6	6	6	5	6	5	6	6	1	6	3	6	6	6	6	2	6	1	6	6	5	6	6	6	6	4
129	0	52	1	1	1	Adenocarcinoma of the colon	24	1	1	1	0	3	2	4	6	2	1	3	6	2	4	2	4	4	6	6	5	6	6	5	4	3	6	2	6	6	6	2	1	6	1	6	3	4	4	6	5	5	5
130	0	60	3	3	1	Malignant tumours of the oesophagus	60	1	1	1	1	2	4	6	6	3	6	5	6	3	5	5	2	4	1	5	5	4	6	5	6	1	4	4	3	3	4	4	1	6	1	4	5	3	3	3	5	4	5
131	0	66	3	3	4	Nasopharyngeal Carcinoma	7	1	1	1	1	1	6	6	6	6	6	6	6	1	6	1	6	6	6	6	6	6	6	6	6	1	6	6	6	6	1	6	6	6	1	6	6	6	6	6	6	6	1
132	0	59	3	1	1	Malignant tumour of the nasopharynx	24	0	0	0	0	2	6	6	6	6	6	6	6	6	6	6	6	6	1	6	6	6	6	6	6	1	6	6	6	6	6	6	6	6	1	6	6	6	6	6	6	6	6
133	1	58	4	1	2	Malignant tumours of the bile ducts	6	0	0	0	1	2	1	6	6	1	4	6	4	4	3	1	4	6	6	6	1	6	3	6	3	1	4	3	4	4	6	3	6	6	1	4	3	3	6	3	5	6	1
134	1	71	2	1	1	Malignant tumour of the pancreas	6	1	1	0	0	3	4	6	5	6	4	4	2	3	5	3	4	4	1	6	4	3	3	6	6	1	3	1	3	4	3	3	1	3	2	2	3	1	2	3	4	5	3
135	1	60	2	1	1	Malignant tumour of the rectum	48	0	0	0	0	2	6	6	6	6	6	6	6	1	1	6	6	6	6	6	6	6	6	6	6	1	6	6	6	6	6	6	6	6	1	6	6	6	6	6	6	6	1
136	1	58	1	1	1	Malignant tumours of the lungs	11	1	0	0	0	3	6	6	6	6	6	6	6	6	1	6	6	6	6	6	6	6	6	6	6	1	6	6	6	6	6	6	6	6	1	6	1	6	6	6	6	6	1
137	1	72	2	1	1	Malignant tumours of the lungs	6	0	0	0	0	2	6	6	6	6	6	6	6	5	6	6	6	2	6	6	6	6	5	6	6	3	6	2	6	6	6	6	6	6	1	6	6	6	6	6	6	6	2
138	1	60	2	1	1	Malignant tumour of the stomach	12	1	1	0	0	2	6	6	6	6	6	6	6	6	1	6	6	4	5	6	6	6	6	6	6	2	6	1	6	6	6	6	6	6	1	6	6	6	6	6	6	6	2
139	1	60	2	1	1	Malignant tumours of the oesophagus	8	0	0	0	0	2	6	6	6	6	6	6	6	6	6	6	6	1	6	6	6	6	6	6	6	1	6	6	6	6	6	6	6	6	1	6	6	6	6	6	6	6	1
140	1	64	3	1	1	Pelvic malignancy	8	0	0	0	0	2	6	6	6	6	6	6	6	6	6	2	6	1	1	6	6	6	6	6	6	1	6	1	6	6	3	6	1	6	1	6	6	6	6	6	6	6	4
141	1	61	3	1	1	Malignant tumour of the colon	12	1	1	0	0	2	6	6	6	6	6	6	6	6	1	5	6	5	1	6	6	6	6	6	6	2	6	1	6	6	6	6	2	6	1	6	6	5	6	5	6	6	2
142	1	68	3	1	1	Malignant tumours of the lungs	12	0	0	0	0	2	6	6	6	6	6	6	6	6	1	6	6	3	1	6	6	6	6	6	6	2	6	1	6	6	6	6	5	6	1	6	6	6	6	6	6	6	2
143	1	68	1	1	4	Malignant tumour of the larynx	7	0	0	1	0	1	6	6	6	6	6	6	6	6	1	6	6	1	4	6	6	6	6	6	6	3	6	1	6	6	6	6	6	6	6	6	6	6	6	6	6	6	3
144	1	64	3	1	1	Malignant tumours of the lungs	12	0	0	0	1	2	6	1	6	6	6	6	6	6	6	6	6	6	6	6	6	6	6	6	6	1	6	6	6	6	6	6	6	6	1	6	6	6	6	6	6	6	6
145	1	52	3	3	1	Malignant tumour of the rectum	15	1	1	1	1	2	5	6	5	6	3	3	3	2	5	2	6	3	1	3	4	6	2	5	6	1	2	2	5	6	2	5	3	5	1	4	3	2	3	3	4	6	1
146	1	67	3	1	1	Malignant tumour of the stomach	15	1	1	0	0	3	6	6	6	6	6	6	6	6	6	3	6	3	1	6	6	6	6	6	6	1	6	6	6	6	6	6	3	6	1	6	4	4	4	4	4	6	6
147	1	58	2	1	2	Malignant tumours of the lungs	10	1	1	1	1	2	3	2	3	3	1	1	1	1	1	4	3	6	1	4	1	3	1	4	4	3	3	4	3	3	4	6	4	1	3	3	3	4	3	4	4	6	1
148	1	72	3	2	2	Malignant tumours of the lungs	12	0	0	0	1	5	6	1	1	1	1	6	1	1	6	6	1	6	6	6	6	1	1	6	6	1	1	6	1	1	6	6	6	1	1	1	1	6	1	6	6	6	1
149	0	70	1	1	1	Adenocarcinoma of the colon	25	1	1	1	0	3	2	4	6	2	1	3	6	2	4	2	4	4	6	6	5	6	6	5	4	3	6	2	6	6	6	2	1	6	1	6	3	4	4	6	5	5	5
150	1	42	3	3	4	Nasopharyngeal Carcinoma	8	1	1	1	1	1	6	6	6	6	6	6	6	1	6	1	6	6	6	6	6	6	6	6	6	1	6	6	6	6	1	6	6	6	1	6	6	6	6	6	6	6	1
151	1	58	3	1	1	Malignant tumour of the hypopharynx	16	1	1	1	0	3	3	4	5	2	4	4	4	3	5	3	5	3	1	6	5	6	3	5	6	1	6	2	6	6	6	4	2	6	1	4	3	1	3	5	4	6	4
152	0	37	3	1	1	Nasopharyngeal cancer	14	1	1	1	0	2	5	6	1	6	5	6	4	1	4	5	4	1	6	6	6	6	6	6	6	3	5	6	6	6	6	6	1	6	3	4	4	4	5	3	4	6	6
153	1	66	1	1	1	lung cancer	7	0	1	1	0	3	3	3	6	4	3	1	6	6	6	2	5	5	1	6	2	6	2	6	6	1	6	1	6	6	6	1	1	6	1	3	6	2	6	4	4	6	2
154	0	73	1	1	3	Malignant tumours of the lungs	240	1	1	1	0	3	5	5	5	2	6	2	4	5	5	1	4	4	1	6	2	5	3	5	6	3	4	2	6	6	6	2	1	6	1	5	5	2	4	4	6	6	5
155	1	61	2	1	1	Left hilar lung	10	0	1	1	0	3	3	2	5	2	4	3	5	5	5	2	5	3	1	6	1	6	4	6	6	2	6	1	6	5	5	1	1	5	1	5	2	1	3	3	4	5	1
156	1	85	4	1	2	heart failure	24	0	0	0	1	2	1	6	6	1	4	6	4	4	3	1	4	6	6	6	1	6	3	6	3	1	4	3	4	4	6	3	6	6	1	4	3	3	6	3	5	6	1
157	0	53	3	3	1	Malignant tumour of the rectum	72	1	1	1	1	2	5	6	5	6	3	3	3	2	5	2	6	3	1	3	4	6	2	5	6	1	2	2	5	6	2	5	3	5	1	4	3	2	3	3	4	6	1
158	0	69	2	4	3	Malignant tumour of the rectum	68	1	1	1	1	2	3	6	1	6	3	1	6	6	6	3	6	6	6	6	6	6	6	6	6	1	6	5	6	6	6	6	3	4	1	5	2	5	6	2	6	6	6
159	0	64	2	3	1	Malignant tumour of the rectum	53	1	1	0	1	3	4	2	3	3	3	5	3	3	4	4	2	1	4	1	3	3	3	4	4	3	3	5	3	4	4	5	5	5	1	3	3	5	3	5	4	5	1
160	0	46	3	1	1	breast cancer	26	1	1	0	1	1	5	6	5	5	6	5	5	5	5	3	6	6	5	5	5	6	6	5	6	1	5	3	6	5	3	5	4	6	1	5	5	5	6	6	6	6	1
161	0	65	1	1	1	Malignant tumours of the oesophagus	6	0	0	0	1	3	2	2	2	2	3	2	6	1	5	2	5	1	4	6	3	6	2	6	6	1	4	4	6	6	6	2	1	6	1	3	5	4	6	6	6	5	6
162	0	89	1	1	1	Malignant tumours of the lungs	24	0	0	1	0	3	6	5	4	6	4	6	6	5	4	2	2	6	2	5	5	4	5	3	6	2	5	6	4	3	6	4	6	3	4	2	3	6	3	5	4	5	3
163	0	75	1	1	1	Malignant tumour of the stomach	9	1	0	0	1	3	6	6	6	3	1	5	3	1	6	6	6	6	5	5	6	6	5	6	6	1	5	6	5	6	6	3	4	6	1	5	1	6	6	6	6	6	5
164	0	63	2	1	1	breast cancer	24	1	1	0	1	3	3	4	4	5	2	4	4	4	2	2	4	3	2	4	3	4	6	2	2	2	4	3	6	5	3	3	2	5	4	5	4	1	3	4	4	5	4
165	0	75	1	1	3	oral cancer	86	1	0	1	1	3	5	6	3	4	2	5	6	2	3	4	3	5	6	2	6	6	6	5	6	6	6	1	5	5	5	2	3	6	1	6	3	3	6	3	1	6	4
166	0	90	1	4	1	Malignant tumour of the stomach	19	0	0	0	0	3	6	6	6	6	2	5	3	6	1	3	2	2	3	6	1	6	1	1	6	5	4	1	6	6	6	1	1	2	1	5	5	4	6	6	2	6	1
167	1	70	2	1	1	Malignant tumours of the oesophagus	108	1	1	1	1	1	6	6	5	2	1	3	2	2	1	6	6	6	1	6	6	6	4	3	6	1	3	1	2	4	6	6	1	6	1	5	3	6	6	6	6	1	1
168	0	69	3	1	1	pain	83	0	0	0	0	3	6	5	6	6	4	6	3	3	5	3	5	4	3	6	6	5	2	5	6	1	3	1	5	4	3	5	2	4	1	3	2	2	3	3	4	6	3
169	1	66	2	1	1	Malignant tumour of the pancreas	7	1	1	0	0	3	4	6	5	6	4	4	2	3	5	3	4	4	1	6	4	3	3	6	6	1	3	1	3	4	3	3	1	3	2	2	3	1	2	3	4	5	3
170	0	78	3	1	2	Malignant tumour of the ovary	55	1	1	0	1	2	5	6	6	6	5	5	5	4	5	4	4	6	1	6	6	4	2	6	6	1	5	1	3	5	5	4	1	3	1	1	2	2	1	3	5	6	3
171	1	69	3	1	1	bladder cancer	38	1	1	0	0	2	6	6	6	6	4	6	6	3	4	4	6	6	4	6	4	3	3	6	6	1	3	2	6	6	4	5	3	5	1	5	3	3	4	3	4	6	1
172	1	75	2	1	3	Chronic Resistance Lung	71	1	0	0	1	1	2	1	6	3	5	1	6	6	6	3	4	6	2	5	3	6	6	6	6	1	2	2	6	6	6	5	5	6	3	6	5	4	6	5	6	6	6
173	0	75	3	3	1	Malignant tumours of the oesophagus	240	1	1	1	1	2	4	6	6	3	6	5	6	3	5	5	2	4	1	5	5	4	6	5	6	1	4	4	3	3	4	4	1	6	1	4	5	3	3	3	5	4	5
174	0	49	3	1	1	Nasty tumours of the lungs, pleura, ribs	14	1	1	1	1	2	6	6	6	6	6	6	6	6	6	6	6	6	1	6	6	6	6	6	6	1	6	6	6	6	6	6	6	6	1	6	6	6	6	6	6	6	6
175	1	19	2	2	1	Malignant tumour of the pleura	15	1	1	1	0	5	6	6	6	6	6	6	6	6	6	3	6	3	1	6	6	6	6	6	6	1	6	6	6	6	6	6	3	6	1	6	4	4	4	4	4	6	6
176	1	71	2	1	1	Malignant tumour of the larynx	108	1	1	1	1	1	6	1	6	5	6	2	5	5	3	3	5	6	1	6	3	5	5	4	3	2	5	3	3	5	3	4	2	6	4	5	4	3	4	3	3	5	4
177	0	86	1	4	3	Malignant tumour of the liver	3	0	0	0	0	4	6	6	6	6	6	6	6	6	6	6	6	6	1	6	6	6	6	6	6	1	6	6	6	6	6	6	6	6	1	6	6	6	6	6	6	6	6
178	0	53	2	1	1	Malignant tumours of the uterine cervix	24	1	1	0	0	3	6	6	6	6	6	6	6	6	2	5	5	6	1	6	6	6	6	6	6	1	5	6	6	6	6	6	5	6	1	5	6	6	6	6	6	6	6
179	0	74	1	1	1	oral cancer	14	0	1	1	0	4	4	5	6	4	4	3	5	5	2	2	5	2	1	6	3	5	5	2	2	5	5	3	5	5	2	3	2	6	5	5	5	2	5	2	2	2	5
180	1	19	2	2	1	Malignant tumour of bone secondary to lung	36	1	1	1	0	5	4	5	4	2	4	4	3	6	5	3	3	4	1	6	5	6	4	4	6	1	3	4	6	5	6	6	2	4	1	4	6	6	5	6	6	6	2
181	0	67	2	1	2	Malignant tumours of the oesophagus	12	1	1	0	0	4	1	6	6	2	4	4	6	6	5	3	3	4	1	4	6	3	3	4	6	1	3	3	3	6	5	6	2	5	1	4	6	6	3	6	6	4	1
182	0	50	1	3	1	Nasopharyngeal cancer lung metastasis	68	1	1	1	1	1	6	6	6	6	6	6	6	6	6	6	6	6	1	6	6	6	6	6	6	1	1	6	6	6	6	6	6	6	1	6	6	6	6	6	6	6	3
183	0	66	2	1	3	Malignant tumour of the gums	62	1	1	1	0	1	3	6	3	3	5	5	3	6	4	3	2	4	1	6	5	3	3	5	6	1	3	4	6	6	6	4	3	5	1	4	6	6	6	6	6	6	2
184	0	66	1	1	1	Malignant tumour of the ovary	60	1	1	0	0	4	6	6	6	6	6	6	6	1	1	6	6	6	6	6	6	6	6	6	6	1	6	6	6	6	6	6	6	6	1	6	6	6	6	6	6	6	1
185	0	69	2	1	3	Malignant tumour of the tongue	72	0	0	0	1	1	6	6	6	6	6	6	6	6	1	6	6	6	6	6	6	6	6	6	6	1	6	6	6	6	6	6	6	6	1	6	1	6	6	6	6	6	1
186	0	67	1	1	2	Mediastinal metastasis from a malignant tumour of the lung	26	0	1	1	0	4	6	6	6	6	6	6	6	5	6	6	6	2	6	6	6	6	5	6	6	3	6	2	6	6	6	6	6	6	1	6	6	6	6	6	6	6	2
187	1	75	3	1	3	Malignant tumour of the colon	28	1	1	0	0	2	6	6	6	6	6	6	6	6	1	6	6	4	5	6	6	6	6	6	6	2	6	1	6	6	6	6	6	6	1	6	6	6	6	6	6	6	2
188	1	76	4	1	2	Mediastinal metastasis from a malignant tumour of the lung	33	1	1	0	1	1	6	6	6	6	6	6	6	6	6	6	6	1	6	6	6	6	6	6	6	1	6	6	6	6	6	6	6	6	1	6	6	6	6	6	6	6	1
189	0	52	3	1	2	Malignant tumour of the nasopharynx	24	0	1	0	0	2	6	6	6	6	6	6	6	6	6	2	6	1	1	6	6	6	6	6	6	1	6	1	6	6	3	6	1	6	1	6	6	6	6	6	6	6	4
190	0	70	2	4	2	Malignant tumour of the nasopharynx	4	1	0	1	0	2	6	6	6	6	6	6	6	6	1	5	6	5	1	6	6	6	6	6	6	2	6	1	6	6	6	6	2	6	1	6	6	5	6	5	6	6	2
191	1	43	3	4	2	Malignant tumour of the nasopharynx	6	1	0	1	0	5	6	6	6	6	6	6	6	6	6	6	6	6	6	6	6	6	6	6	6	1	6	6	6	6	6	6	3	6	4	6	6	6	6	6	6	6	6
192	1	55	3	1	3	Mediastinal metastasis from a malignant tumour of the lung	6	0	1	0	1	1	6	6	6	6	6	6	6	6	1	6	6	1	4	6	6	6	6	6	6	3	6	1	6	6	6	6	6	6	6	6	6	6	6	6	6	6	3
193	1	55	2	1	1	Mediastinal metastasis from a malignant tumour of the lung	8	0	1	0	1	4	6	1	6	6	6	6	6	6	6	6	6	6	6	6	6	6	6	6	6	1	6	6	6	6	6	6	6	6	1	6	6	6	6	6	6	6	6
194	1	61	2	1	3	Mediastinal metastasis from a malignant tumour of the lung	12	0	1	0	0	2	3	2	3	3	1	1	1	1	1	4	3	6	1	4	1	3	1	4	4	3	3	4	3	3	4	6	4	1	3	3	3	4	3	4	4	6	1
195	1	60	3	1	2	Malignant tumour of the colon	36	1	1	0	0	1	6	1	1	1	1	6	1	1	6	6	1	6	6	6	6	1	1	6	6	1	1	6	1	1	6	6	6	1	1	1	1	6	1	6	6	6	1
196	1	64	2	1	1	Malignant tumour of the colon	22	0	1	0	0	4	5	5	2	3	3	4	3	3	4	4	5	5	5	4	4	3	3	4	4	2	5	5	5	5	4	4	4	3	3	3	3	4	3	5	5	5	2
197	1	66	3	1	2	Malignant tumours of the lungs Malignant tumours of the rectum	4	0	0	0	1	3	6	6	6	6	6	6	6	6	1	6	6	3	1	6	6	6	6	6	6	2	6	1	6	6	6	6	5	6	1	6	6	6	6	6	6	6	2
198	1	66	2	1	2	Malignant tumour of the colon	48	1	1	1	1	2	3	5	6	6	1	6	6	5	2	6	1	3	6	1	6	6	1	1	2	1	1	3	4	4	3	6	6	6	1	5	6	1	4	3	6	6	6
199	0	70	1	4	2	Malignant tumour of the colon	27	0	1	0	0	5	3	4	4	4	4	3	4	4	3	3	4	3	3	3	3	4	4	3	3	4	4	3	4	4	3	3	3	4	4	4	4	3	4	3	3	3	4
200	0	58	2	1	2	Malignant tumours of the lungs	7	0	1	0	0	3	5	4	3	4	5	5	4	3	4	4	4	3	3	6	2	3	5	4	2	4	5	3	4	4	4	6	3	4	4	5	6	3	4	3	5	4	3
201	1	71	2	1	1	Multiple metastases from lung occupations	5	0	1	0	0	3	6	1	1	1	1	6	1	1	6	6	1	6	6	6	6	1	1	6	6	1	1	6	1	1	6	6	6	1	1	1	1	6	1	6	6	6	1
202	1	69	2	1	2	Malignant tumour of the kidney	336	1	1	1	1	2	6	6	6	6	6	6	6	6	6	6	6	6	1	6	6	6	6	6	6	2	6	1	6	6	6	6	6	6	1	6	6	6	6	6	6	6	2
203	0	60	2	3	1	Malignant tumour of the ovary	108	1	1	0	1	2	6	6	5	6	6	6	6	6	4	6	6	6	6	6	6	6	6	4	6	6	6	4	6	6	6	6	6	6	1	6	6	6	6	6	6	4	2
204	0	63	3	2	1	Malignant tumour of the ovary	48	1	1	0	0	2	6	1	6	6	6	5	6	6	6	6	6	6	6	6	5	6	6	6	5	1	6	3	6	6	6	6	5	6	1	6	6	6	6	6	6	6	6
205	0	36	3	2	1	breast cancer	6	1	1	0	1	5	6	5	6	6	6	6	6	4	6	4	6	6	6	6	6	6	6	6	6	4	6	3	6	6	6	6	6	6	1	6	6	6	6	3	6	6	6
206	0	52	2	3	2	Malignant tumours of the uterine cervix	24	1	1	0	0	1	6	6	6	6	6	6	6	1	6	6	6	6	6	6	6	6	6	6	6	1	6	6	6	6	6	6	1	6	1	6	6	6	6	6	6	6	1
207	0	46	3	1	1	Malignant tumours of the uterine cervix	6	1	1	0	1	1	6	6	6	1	6	6	6	6	6	6	6	6	6	6	6	6	6	6	6	1	6	6	6	6	6	6	6	6	1	6	6	6	6	6	6	6	6
208	1	56	2	1	1	Non-Hodgkin's lymphoma	12	1	1	0	0	3	6	6	6	6	6	6	6	6	6	6	6	6	6	6	6	6	6	6	6	1	6	6	6	6	6	6	6	6	1	6	6	6	6	6	6	6	1
209	0	68	1	1	2	acute myeloid leukaemia	12	0	1	0	0	5	4	6	6	6	6	6	6	2	6	6	6	6	6	6	6	6	6	6	6	1	6	6	6	6	6	6	6	6	1	6	6	6	6	6	6	5	5
210	1	72	1	1	1	Malignant tumour of the sigmoid colon	48	1	1	0	0	4	6	6	6	6	6	6	6	4	3	3	4	6	6	6	6	6	6	3	3	4	4	3	4	4	3	6	3	6	4	4	4	3	4	3	3	6	6
211	1	65	1	1	2	Malignant tumour of the colon	36	1	1	0	0	3	5	5	5	5	6	5	5	4	4	5	5	5	2	5	5	5	5	4	5	3	6	5	5	5	5	5	4	5	2	5	5	4	4	5	3	5	5
212	1	60	1	1	1	malignant lymphoma	13	0	1	0	1	3	4	1	2	2	2	6	3	1	5	4	3	5	5	5	5	3	1	5	5	2	2	4	2	3	4	5	4	3	2	3	3	4	3	5	5	5	2
213	1	64	1	4	1	Malignant tumour of the liver	8	0	1	0	0	4	6	1	1	1	1	6	1	1	6	6	1	6	6	6	6	1	1	6	6	1	1	6	1	1	6	6	6	1	1	1	1	6	1	6	6	6	1
214	1	64	1	1	1	Malignant tumour of the rectum	8	0	1	0	0	1	6	6	6	6	6	1	6	5	6	6	6	6	6	6	6	6	6	6	6	1	6	6	6	6	5	6	5	6	1	6	6	6	6	6	6	6	6
215	1	64	2	1	2	Malignant tumours of the lungs	5	0	1	0	1	3	6	1	6	6	6	6	6	6	6	6	6	6	6	6	6	6	6	6	6	1	6	6	6	6	6	6	4	6	6	6	6	6	6	6	6	6	6
216	1	64	2	1	2	Malignant tumour of the colon	60	1	1	0	0	3	6	2	6	6	6	6	6	5	6	6	6	5	6	6	6	6	6	6	6	1	6	2	6	6	5	6	5	6	1	6	6	6	6	6	5	4	5
217	0	45	3	1	4	Malignant tumour of the thyroid gland	36	1	1	0	1	4	3	6	6	6	6	5	6	4	6	4	5	6	3	6	6	6	6	5	6	1	5	5	5	2	5	6	6	6	1	6	3	4	6	6	5	6	6
218	0	71	1	4	4	advanced ovarian cancer	48	1	1	0	1	4	6	6	6	6	6	6	6	6	6	6	6	6	6	6	6	6	6	6	6	1	6	6	6	6	6	6	6	6	1	6	6	6	6	6	6	6	6
219	0	59	2	1	1	Malignant tumour of fallopian tube	61	1	1	0	0	3	5	6	6	6	6	4	6	6	3	5	6	4	4	5	5	6	6	4	4	2	6	5	6	6	4	5	4	6	2	6	6	4	6	5	4	5	6
220	0	53	2	1	1	Cervical Cancer Surgery	24	1	1	0	0	3	3	4	5	3	2	4	2	5	2	4	3	1	2	2	2	5	2	2	4	5	3	2	5	5	4	2	5	5	2	5	5	5	3	4	2	4	3
221	0	62	2	1	1	Malignant tumour of the ovary	53	1	1	0	0	3	6	1	6	6	6	6	6	6	6	6	1	6	6	6	6	6	6	6	6	1	6	4	6	6	6	6	6	6	1	6	6	6	6	6	6	6	6
222	0	65	1	1	3	Malignant tumours of the uterine cervix	36	0	1	0	0	3	5	3	4	3	4	4	4	3	2	2	3	4	4	2	4	4	3	4	5	2	4	4	4	4	3	4	5	5	4	5	5	4	3	5	4	2	3
223	0	53	2	1	2	Malignant tumour of the ovary	36	1	1	0	0	2	6	6	6	6	6	6	6	6	6	6	6	6	1	6	6	6	6	6	6	1	6	6	6	6	6	6	6	6	1	6	6	6	6	6	6	6	6
224	1	59	2	1	4	acute leukaemia	6	0	1	0	0	4	6	4	4	4	4	3	4	3	3	3	4	5	3	5	3	4	5	3	3	4	4	3	4	5	3	5	2	5	4	4	4	3	4	3	3	2	2
225	1	68	2	1	1	multiple myeloma	84	0	1	0	0	3	6	6	6	6	6	6	6	6	6	6	6	6	6	6	6	6	6	6	6	1	6	6	6	6	6	6	6	6	1	6	6	6	6	6	6	6	1
226	1	70	4	1	2	leukaemia	7	0	1	0	0	2	6	1	5	1	5	6	5	6	5	5	6	6	6	6	6	6	6	5	6	2	5	4	5	5	4	6	2	6	1	6	5	5	5	3	5	6	6
227	1	77	3	1	1	Non-Hodgkin's lymphoma	12	0	1	0	0	3	6	6	6	1	6	5	6	4	6	3	6	2	1	3	4	6	4	5	4	4	4	3	4	4	3	6	1	6	1	6	6	5	4	3	3	2	6
228	1	52	3	1	2	Hodgkin's lymphoma	7	0	1	0	0	2	5	4	3	3	3	4	3	3	2	4	3	3	4	3	4	4	5	3	4	3	3	3	4	5	4	4	3	3	3	4	3	2	4	5	3	4	3
229	1	53	3	1	3	multiple myeloma	5	0	1	0	0	5	6	6	6	6	6	6	6	5	5	6	6	4	4	6	5	6	6	5	5	4	6	4	6	6	4	6	5	6	1	6	6	6	6	6	6	4	5
230	1	50	4	1	1	Non-Hodgkin's lymphoma	5	0	1	0	0	3	3	4	4	5	6	3	4	2	3	3	4	3	4	3	3	5	4	3	3	5	5	1	5	5	2	3	4	4	4	4	4	3	4	3	3	4	4
231	0	28	3	2	2	acute myeloid leukaemia	6	0	1	0	0	2	6	1	6	6	6	6	6	4	3	3	4	6	1	6	6	6	4	3	3	4	4	3	4	4	3	6	1	4	4	4	4	3	4	3	3	6	6
232	1	45	4	1	1	lymphomas	12	0	1	0	0	3	6	3	1	3	1	3	1	1	6	4	4	3	3	3	6	1	1	6	4	4	2	6	4	1	4	6	3	1	2	3	1	3	3	4	6	6	3
233	1	59	1	1	3	multiple myeloma	8	0	1	0	0	5	6	2	2	2	3	6	3	2	5	5	2	4	3	5	4	2	2	5	4	2	4	4	2	2	4	6	4	1	2	3	2	4	3	4	5	4	2
234	1	48	3	1	1	multiple myeloma	5	0	1	0	0	3	4	6	6	6	6	6	1	6	1	1	3	6	6	6	6	6	1	4	4	3	3	4	3	3	4	1	1	1	1	1	3	4	3	4	5	6	6
235	1	95	1	4	4	Malignant tumours of the lungs	9	0	0	0	0	1	6	6	6	6	6	6	6	6	5	5	6	6	6	6	6	6	6	6	5	1	6	4	6	6	5	6	3	6	2	6	6	6	6	6	5	6	6
236	1	105	1	1	2	Malignant tumour of the colon	13	0	1	0	0	1	5	6	6	6	6	6	6	5	1	4	6	4	5	6	6	6	6	5	5	2	6	3	6	6	5	6	6	6	1	6	5	5	6	6	6	5	6
237	0	72	1	4	2	Malignant tumour of the tonsils	12	1	1	0	0	3	5	6	6	6	6	5	6	5	6	4	6	5	5	6	6	6	6	5	1	3	6	3	6	6	4	6	4	6	1	6	6	6	4	6	6	5	5
238	0	71	2	1	4	Malignant tumours of the lungs	8	0	1	0	0	4	3	3	5	5	4	2	3	4	3	3	4	3	4	3	2	4	3	3	3	4	4	3	5	4	3	3	3	4	3	4	4	3	4	4	3	5	5
239	0	86	1	4	2	breast cancer	60	1	1	0	1	4	5	2	4	4	5	5	5	4	4	4	4	5	6	6	5	3	4	5	5	3	5	6	6	5	6	6	3	6	2	4	5	5	5	5	6	5	1
240	0	43	3	1	2	breast cancer	24	1	1	1	0	3	6	6	6	6	6	6	6	6	3	4	4	6	6	6	6	6	2	5	3	1	6	2	6	6	6	6	6	6	1	6	6	6	6	6	6	6	5
241	1	69	2	1	3	Malignant tumour of the larynx	13	1	1	1	0	5	5	5	5	4	4	4	4	4	4	4	4	3	3	5	4	3	3	4	5	3	5	5	4	5	4	5	3	5	2	3	3	2	5	5	4	4	4
242	1	52	3	1	1	Malignant tumour of the hypopharynx	11	1	0	1	1	2	3	4	4	4	4	3	4	3	4	4	3	3	3	3	3	4	4	4	4	3	3	4	3	3	4	3	3	4	3	3	3	4	3	4	4	3	4
243	0	z w	1	2	1	Malignant tumours of the brain	24	1	1	0	0	5	4	3	3	3	3	4	3	4	3	3	4	4	4	4	4	3	3	3	3	3	4	3	3	3	4	4	4	3	4	4	4	3	4	4	4	4	3
244	0	19	1	2	1	Malignant tumour of the brain	20	1	0	1	0	5	6	6	6	6	6	6	6	6	6	6	6	6	6	6	6	6	6	6	6	1	6	6	6	6	6	6	6	6	1	6	6	6	6	6	6	6	1
245	0	64	1	1	3	Malignant tumours of the lungs	11	1	1	0	0	4	5	6	4	4	3	4	5	4	4	4	3	3	4	4	4	5	3	3	4	1	5	3	3	4	2	4	1	4	5	5	4	4	4	5	4	3	3
246	0	67	2	1	2	Malignant tumour of the mediastinum of the lung	28	1	1	0	0	3	6	6	6	6	6	6	6	6	6	6	6	6	6	6	6	6	6	6	6	1	6	6	6	6	6	6	6	6	1	6	6	6	6	6	6	6	1
247	0	59	2	1	1	Malignant tumours of the lungs	14	1	1	0	0	3	6	1	1	6	6	6	6	5	6	6	6	6	6	6	6	6	6	6	6	1	6	6	6	6	6	6	6	6	1	6	6	6	6	6	6	6	1
248	1	55	3	1	2	Malignant tumours of the lungs	9	0	1	0	0	1	6	6	6	6	5	6	6	5	3	6	1	5	5	6	5	6	6	5	5	1	6	4	6	6	3	6	4	6	1	6	5	4	6	6	6	6	6
249	0	52	2	1	3	Malignant tumour of the nasopharynx	24	0	0	1	0	3	6	1	1	1	1	6	1	1	6	6	1	6	6	6	6	1	1	6	6	1	2	6	1	1	6	6	6	1	1	1	1	6	1	6	6	6	1
250	0	62	3	1	1	Malignant tumour of the ovary	70	1	1	0	0	3	6	6	6	6	6	6	5	3	6	6	5	6	6	6	6	5	6	6	2	1	5	6	5	5	5	6	6	6	1	5	5	6	5	6	6	6	6
251	0	67	1	1	1	breast cancer	48	1	1	0	0	5	6	6	6	6	6	6	6	6	6	6	6	6	6	6	6	6	6	6	6	1	6	6	6	6	6	6	6	6	1	6	6	6	6	6	6	6	6
252	1	62	1	1	3	Malignant tumours of the external auditory canal of the skin	7	1	1	0	1	4	4	4	4	3	4	3	3	3	4	4	3	3	4	3	3	3	3	4	4	3	3	4	3	3	4	3	4	3	3	3	3	4	3	4	4	3	4
253	1	60	3	1	1	Malignant tumour of the stomach	12	1	1	0	1	3	6	5	6	5	6	2	4	5	4	4	4	6	6	6	6	6	3	6	6	1	6	6	4	5	5	6	1	3	3	3	3	4	1	4	6	6	6
254	1	54	1	1	1	Malignant tumours of the lungs	10	0	1	0	0	5	6	6	6	6	6	6	6	3	5	5	6	6	6	6	6	6	6	6	5	4	6	6	5	6	6	6	5	6	1	6	6	6	6	6	6	6	4
255	0	51	1	1	1	Malignant tumour of the pancreas	6	0	1	0	0	5	3	4	5	4	5	3	5	5	3	2	5	4	2	2	2	5	5	2	3	3	5	3	4	4	3	2	2	4	5	5	5	3	4	2	3	4	2
256	1	77	1	1	3	Malignant tumour of the stomach	10	0	1	0	1	4	4	3	3	3	3	4	3	3	4	3	4	4	4	4	4	3	3	3	3	3	3	3	3	3	4	4	4	3	3	4	4	3	3	4	4	4	3
257	1	53	2	3	1	Malignant tumour of the kidney	48	1	0	0	1	3	6	1	1	1	1	6	1	1	6	6	1	6	6	6	6	1	1	6	6	1	1	6	1	1	6	6	6	1	1	1	1	6	1	6	6	6	1
258	1	68	1	1	1	Malignant tumours of the oesophagus	24	1	1	0	0	3	6	6	6	6	4	6	6	5	5	6	5	6	6	6	5	6	6	6	6	1	6	6	5	5	6	6	3	1	1	5	5	6	5	6	6	6	6
259	0	79	1	1	1	Colonic Ca pain	24	1	1	0	0	4	3	3	4	4	4	3	4	4	3	3	5	4	3	3	4	4	4	3	3	4	4	2	4	4	3	3	3	4	5	5	5	3	4	3	3	3	3
260	1	68	3	1	1	Malignant tumours of the lungs	72	1	1	0	0	2	6	1	1	1	1	6	1	1	6	6	1	6	6	6	6	1	1	6	6	1	1	6	1	1	5	6	6	1	1	1	2	6	1	6	5	6	1
261	1	63	3	3	1	Malignant tumour of the rectum	7	0	1	0	0	3	3	4	2	3	4	2	4	4	4	5	2	1	1	3	4	5	4	3	3	3	3	1	3	4	3	3	3	4	4	2	2	1	2	1	1	2	4
262	1	70	1	4	3	Malignant tumour of the hypopharynx	7	0	1	0	0	4	4	3	3	3	3	4	3	3	4	4	3	4	4	4	4	3	3	4	4	4	3	4	3	3	3	4	4	3	3	3	3	4	3	3	4	4	3
263	1	53	3	1	2	Malignant tumour of the hypopharynx	7	0	1	1	0	1	5	5	5	5	5	5	6	2	5	5	5	5	5	5	5	5	6	5	5	5	6	4	5	6	5	5	3	6	2	5	4	4	4	4	5	6	5
264	0	64	3	1	2	Malignant tumours of the lungs	13	0	1	0	1	3	5	6	5	5	5	1	6	1	1	6	6	6	6	6	6	6	1	6	6	1	6	1	6	6	6	6	6	6	1	6	6	6	6	6	6	6	5
265	0	36	3	1	3	breast cancer	60	1	1	0	1	3	6	6	6	6	6	6	6	6	1	6	6	6	6	6	6	6	6	6	6	6	6	1	6	6	6	6	6	6	1	6	6	6	6	6	6	6	6
266	0	64	2	1	1	Malignant tumour of the colon	18	1	1	0	0	4	4	3	3	3	3	4	3	3	4	4	3	4	4	4	4	3	3	4	4	3	3	4	3	3	4	4	4	3	3	3	3	4	3	4	4	4	3
267	0	75	3	1	1	oral cancer	5	0	0	1	0	2	6	4	4	5	5	4	6	5	4	4	5	6	6	6	5	5	5	4	4	5	5	4	5	5	4	4	3	5	3	4	3	4	6	2	2	6	5
268	0	76	1	1	3	Malignant tumours of the lungs	10	0	1	0	0	4	6	3	4	6	6	6	1	1	6	6	1	6	6	6	6	6	6	6	6	4	5	2	1	6	4	6	1	6	1	1	6	3	1	4	4	6	1
269	0	67	1	1	4	Malignant tumours of the oesophagus	8	0	1	1	0	4	6	6	5	4	4	3	3	3	3	3	4	6	6	6	3	6	2	3	3	3	3	6	3	3	4	6	4	3	1	4	4	3	3	5	4	6	1
270	1	57	1	1	3	Malignant tumour of the stomach	24	1	1	1	0	4	1	2	1	1	1	6	1	1	2	1	1	6	1	6	6	6	1	3	4	1	1	1	1	1	1	6	1	1	1	1	1	2	1	6	6	6	1
271	1	71	2	1	3	Colonic liver secondary	32	0	1	1	0	4	3	3	6	6	6	3	6	6	3	2	6	1	3	3	4	6	1	6	6	1	6	2	6	6	2	4	1	6	1	6	6	3	6	6	6	3	4
272	0	61	4	3	2	breast cancer	60	1	1	1	1	1	6	6	6	6	6	6	6	6	6	6	6	6	6	6	6	6	6	6	6	3	6	6	6	6	6	6	5	6	1	6	6	6	6	6	6	6	6
273	0	76	3	1	2	Malignant tumour of the liver	12	0	1	0	1	2	4	3	3	3	3	4	3	3	4	4	3	4	4	4	4	3	3	4	4	3	3	4	3	3	4	4	4	3	3	3	3	4	3	4	4	4	3
274	1	65	3	1	1	Malignant tumours of the lungs	12	1	1	0	0	2	6	6	6	1	1	6	6	4	4	6	6	6	6	6	6	6	6	4	6	2	6	4	3	6	6	6	6	6	1	6	4	6	6	6	6	6	1
275	1	55	3	1	1	Malignant tumours of the lungs	8	0	1	1	0	2	3	4	3	4	4	3	4	3	3	3	3	4	4	4	3	4	4	4	4	3	4	4	3	3	3	4	4	4	4	3	3	3	4	3	4	3	4
276	0	74	4	1	2	lung cancer	14	1	1	1	0	2	6	6	6	6	4	6	6	6	6	2	3	6	6	6	5	6	5	6	6	1	6	3	6	6	6	6	2	6	1	6	6	5	6	6	6	6	4
277	0	52	1	1	1	Adenocarcinoma of the colon	24	1	1	1	0	3	2	4	6	2	1	3	6	2	4	2	4	4	6	6	5	6	6	5	4	3	6	2	6	6	6	2	1	6	1	6	3	4	4	6	5	5	5
278	0	60	3	3	1	Malignant tumours of the oesophagus	60	1	1	1	1	2	4	6	6	3	6	5	6	3	5	5	2	4	1	5	5	4	6	5	6	1	4	4	3	3	4	4	1	6	1	4	5	3	3	3	5	4	5
279	0	66	3	3	4	Nasopharyngeal Carcinoma	7	1	1	1	1	1	6	6	6	6	6	6	6	1	6	1	6	6	6	6	6	6	6	6	6	1	6	6	6	6	1	6	6	6	1	6	6	6	6	6	6	6	1
280	0	59	3	1	1	Malignant tumour of the nasopharynx	24	0	0	0	0	2	6	6	6	6	6	6	6	6	6	6	6	6	1	6	6	6	6	6	6	1	6	6	6	6	6	6	6	6	1	6	6	6	6	6	6	6	6
281	1	58	4	1	2	Malignant tumours of the bile ducts	6	0	0	0	1	2	1	6	6	1	4	6	4	4	3	1	4	6	6	6	1	6	3	6	3	1	4	3	4	4	6	3	6	6	1	4	3	3	6	3	5	6	1
282	1	71	2	1	1	Malignant tumour of the pancreas	6	1	1	0	0	3	4	6	5	6	4	4	2	3	5	3	4	4	1	6	4	3	3	6	6	1	3	1	3	4	3	3	1	3	2	2	3	1	2	3	4	5	3
283	1	60	2	1	1	Malignant tumour of the rectum	48	0	0	0	0	2	6	6	6	6	6	6	6	1	1	6	6	6	6	6	6	6	6	6	6	1	6	6	6	6	6	6	6	6	1	6	6	6	6	6	6	6	1
284	1	58	1	1	1	Malignant tumours of the lungs	11	1	0	0	0	3	6	6	6	6	6	6	6	6	1	6	6	6	6	6	6	6	6	6	6	1	6	6	6	6	6	6	6	6	1	6	1	6	6	6	6	6	1
285	1	72	2	1	1	Malignant tumours of the lungs	6	0	0	0	0	2	6	6	6	6	6	6	6	5	6	6	6	2	6	6	6	6	5	6	6	3	6	2	6	6	6	6	6	6	1	6	6	6	6	6	6	6	2
286	1	60	2	1	1	Malignant tumour of the stomach	12	1	1	0	0	2	6	6	6	6	6	6	6	6	1	6	6	4	5	6	6	6	6	6	6	2	6	1	6	6	6	6	6	6	1	6	6	6	6	6	6	6	2
287	1	60	2	1	1	Malignant tumours of the oesophagus	8	0	0	0	0	2	6	6	6	6	6	6	6	6	6	6	6	1	6	6	6	6	6	6	6	1	6	6	6	6	6	6	6	6	1	6	6	6	6	6	6	6	1
288	1	64	3	1	1	Pelvic malignancy	8	0	0	0	0	2	6	6	6	6	6	6	6	6	6	2	6	1	1	6	6	6	6	6	6	1	6	1	6	6	3	6	1	6	1	6	6	6	6	6	6	6	4
289	1	61	3	1	1	Malignant tumour of the colon	12	1	1	0	0	2	6	6	6	6	6	6	6	6	1	5	6	5	1	6	6	6	6	6	6	2	6	1	6	6	6	6	2	6	1	6	6	5	6	5	6	6	2
290	1	68	3	1	1	Malignant tumours of the lungs	12	0	0	0	0	2	6	6	6	6	6	6	6	6	1	6	6	3	1	6	6	6	6	6	6	2	6	1	6	6	6	6	5	6	1	6	6	6	6	6	6	6	2
291	1	68	1	1	4	Malignant tumour of the larynx	7	0	0	1	0	1	6	6	6	6	6	6	6	6	1	6	6	1	4	6	6	6	6	6	6	3	6	1	6	6	6	6	6	6	6	6	6	6	6	6	6	6	3
292	1	64	3	1	1	Malignant tumours of the lungs	12	0	0	0	1	2	6	1	6	6	6	6	6	6	6	6	6	6	6	6	6	6	6	6	6	1	6	6	6	6	6	6	6	6	1	6	6	6	6	6	6	6	6
293	1	52	3	3	1	Malignant tumour of the rectum	15	1	1	1	1	2	5	6	5	6	3	3	3	2	5	2	6	3	1	3	4	6	2	5	6	1	2	2	5	6	2	5	3	5	1	4	3	2	3	3	4	6	1
294	1	67	3	1	1	Malignant tumour of the stomach	15	1	1	0	0	3	6	6	6	6	6	6	6	6	6	3	6	3	1	6	6	6	6	6	6	1	6	6	6	6	6	6	3	6	1	6	4	4	4	4	4	6	6
295	1	58	2	1	2	Malignant tumours of the lungs	10	1	1	1	1	2	3	2	3	3	1	1	1	1	1	4	3	6	1	4	1	3	1	4	4	3	3	4	3	3	4	6	4	1	3	3	3	4	3	4	4	6	1
296	1	72	3	2	2	Malignant tumours of the lungs	12	0	0	0	1	5	6	1	1	1	1	6	1	1	6	6	1	6	6	6	6	1	1	6	6	1	1	6	1	1	6	6	6	1	1	1	1	6	1	6	6	6	1
297	0	70	1	1	1	Adenocarcinoma of the colon	25	1	1	1	0	3	2	4	6	2	1	3	6	2	4	2	4	4	6	6	5	6	6	5	4	3	6	2	6	6	6	2	1	6	1	6	3	4	4	6	5	5	5
298	1	42	3	3	4	Nasopharyngeal Carcinoma	8	1	1	1	1	1	6	6	6	6	6	6	6	1	6	1	6	6	6	6	6	6	6	6	6	1	6	6	6	6	1	6	6	6	1	6	6	6	6	6	6	6	1
299	1	58	3	1	1	Malignant tumour of the hypopharynx	16	1	1	1	0	3	3	4	5	2	4	4	4	3	5	3	5	3	1	6	5	6	3	5	6	1	6	2	6	6	6	4	2	6	1	4	3	1	3	5	4	6	4
300	0	37	3	1	1	Nasopharyngeal cancer	14	1	1	1	0	2	5	6	1	6	5	6	4	1	4	5	4	1	6	6	6	6	6	6	6	3	5	6	6	6	6	6	1	6	3	4	4	4	5	3	4	6	6
301	1	66	1	1	1	lung cancer	7	0	1	1	0	3	3	3	6	4	3	1	6	6	6	2	5	5	1	6	2	6	2	6	6	1	6	1	6	6	6	1	1	6	1	3	6	2	6	4	4	6	2
302	0	73	1	1	3	Malignant tumours of the lungs	240	1	1	1	0	3	5	5	5	2	6	2	4	5	5	1	4	4	1	6	2	5	3	5	6	3	4	2	6	6	6	2	1	6	1	5	5	2	4	4	6	6	5
303	1	61	2	1	1	Left hilar lung	10	0	1	1	0	3	3	2	5	2	4	3	5	5	5	2	5	3	1	6	1	6	4	6	6	2	6	1	6	5	5	1	1	5	1	5	2	1	3	3	4	5	1
304	1	85	4	1	2	heart failure	24	0	0	0	1	2	1	6	6	1	4	6	4	4	3	1	4	6	6	6	1	6	3	6	3	1	4	3	4	4	6	3	6	6	1	4	3	3	6	3	5	6	1
305	0	53	3	3	1	Malignant tumour of the rectum	72	1	1	1	1	2	5	6	5	6	3	3	3	2	5	2	6	3	1	3	4	6	2	5	6	1	2	2	5	6	2	5	3	5	1	4	3	2	3	3	4	6	1
306	0	69	2	4	3	Malignant tumour of the rectum	68	1	1	1	1	2	3	6	1	6	3	1	6	6	6	3	6	6	6	6	6	6	6	6	6	1	6	5	6	6	6	6	3	4	1	5	2	5	6	2	6	6	6
307	0	64	2	3	1	Malignant tumour of the rectum	53	1	1	0	1	3	4	2	3	3	3	5	3	3	4	4	2	1	4	1	3	3	3	4	4	3	3	5	3	4	4	5	5	5	1	3	3	5	3	5	4	5	1
308	0	46	3	1	1	breast cancer	26	1	1	0	1	1	5	6	5	5	6	5	5	5	5	3	6	6	5	5	5	6	6	5	6	1	5	3	6	5	3	5	4	6	1	5	5	5	6	6	6	6	1
309	0	65	1	1	1	Malignant tumours of the oesophagus	6	0	0	0	1	3	2	2	2	2	3	2	6	1	5	2	5	1	4	6	3	6	2	6	6	1	4	4	6	6	6	2	1	6	1	3	5	4	6	6	6	5	6
310	0	89	1	1	1	Malignant tumours of the lungs	24	0	0	1	0	3	6	5	4	6	4	6	6	5	4	2	2	6	2	5	5	4	5	3	6	2	5	6	4	3	6	4	6	3	4	2	3	6	3	5	4	5	3
311	0	75	1	1	1	Malignant tumour of the stomach	9	1	0	0	1	3	6	6	6	3	1	5	3	1	6	6	6	6	5	5	6	6	5	6	6	1	5	6	5	6	6	3	4	6	1	5	1	6	6	6	6	6	5
312	0	63	2	1	1	breast cancer	24	1	1	0	1	3	3	4	4	5	2	4	4	4	2	2	4	3	2	4	3	4	6	2	2	2	4	3	6	5	3	3	2	5	4	5	4	1	3	4	4	5	4
313	0	75	1	1	3	oral cancer	86	1	0	1	1	3	5	6	3	4	2	5	6	2	3	4	3	5	6	2	6	6	6	5	6	6	6	1	5	5	5	2	3	6	1	6	3	3	6	3	1	6	4
314	0	90	1	4	1	Malignant tumour of the stomach	19	0	0	0	0	3	6	6	6	6	2	5	3	6	1	3	2	2	3	6	1	6	1	1	6	5	4	1	6	6	6	1	1	2	1	5	5	4	6	6	2	6	1
315	1	70	2	1	1	Malignant tumours of the oesophagus	108	1	1	1	1	1	6	6	5	2	1	3	2	2	1	6	6	6	1	6	6	6	4	3	6	1	3	1	2	4	6	6	1	6	1	5	3	6	6	6	6	1	1
316	0	69	3	1	1	pain	83	0	0	0	0	3	6	5	6	6	4	6	3	3	5	3	5	4	3	6	6	5	2	5	6	1	3	1	5	4	3	5	2	4	1	3	2	2	3	3	4	6	3
317	1	66	2	1	1	Malignant tumour of the pancreas	7	1	1	0	0	3	4	6	5	6	4	4	2	3	5	3	4	4	1	6	4	3	3	6	6	1	3	1	3	4	3	3	1	3	2	2	3	1	2	3	4	5	3
318	0	78	3	1	2	Malignant tumour of the ovary	55	1	1	0	1	2	5	6	6	6	5	5	5	4	5	4	4	6	1	6	6	4	2	6	6	1	5	1	3	5	5	4	1	3	1	1	2	2	1	3	5	6	3
319	1	69	3	1	1	bladder cancer	38	1	1	0	0	2	6	6	6	6	4	6	6	3	4	4	6	6	4	6	4	3	3	6	6	1	3	2	6	6	4	5	3	5	1	5	3	3	4	3	4	6	1
320	1	75	2	1	3	Chronic Resistance Lung	71	1	0	0	1	1	2	1	6	3	5	1	6	6	6	3	4	6	2	5	3	6	6	6	6	1	2	2	6	6	6	5	5	6	3	6	5	4	6	5	6	6	6
321	0	75	3	3	1	Malignant tumours of the oesophagus	240	1	1	1	1	2	4	6	6	3	6	5	6	3	5	5	2	4	1	5	5	4	6	5	6	1	4	4	3	3	4	4	1	6	1	4	5	3	3	3	5	4	5
322	0	49	3	1	1	Nasty tumours of the lungs, pleura, ribs	14	1	1	1	1	2	6	6	6	6	6	6	6	6	6	6	6	6	1	6	6	6	6	6	6	1	6	6	6	6	6	6	6	6	1	6	6	6	6	6	6	6	6
323	1	19	2	2	1	Malignant tumour of the pleura	15	1	1	1	0	5	6	6	6	6	6	6	6	6	6	3	6	3	1	6	6	6	6	6	6	1	6	6	6	6	6	6	3	6	1	6	4	4	4	4	4	6	6
324	1	71	2	1	1	Malignant tumour of the larynx	108	1	1	1	1	1	6	1	6	5	6	2	5	5	3	3	5	6	1	6	3	5	5	4	3	2	5	3	3	5	3	4	2	6	4	5	4	3	4	3	3	5	4
325	0	86	1	4	3	Malignant tumour of the liver	3	0	0	0	0	4	6	6	6	6	6	6	6	6	6	6	6	6	1	6	6	6	6	6	6	1	6	6	6	6	6	6	6	6	1	6	6	6	6	6	6	6	6
326	0	53	2	1	1	Malignant tumours of the uterine cervix	24	1	1	0	0	3	6	6	6	6	6	6	6	6	2	5	5	6	1	6	6	6	6	6	6	1	5	6	6	6	6	6	5	6	1	5	6	6	6	6	6	6	6
327	0	74	1	1	1	oral cancer	14	0	1	1	0	4	4	5	6	4	4	3	5	5	2	2	5	2	1	6	3	5	5	2	2	5	5	3	5	5	2	3	2	6	5	5	5	2	5	2	2	2	5
328	1	19	2	2	1	Malignant tumour of bone secondary to lung	36	1	1	1	0	5	4	5	4	2	4	4	3	6	5	3	3	4	1	6	5	6	4	4	6	1	3	4	6	5	6	6	2	4	1	4	6	6	5	6	6	6	2
329	0	67	2	1	2	Malignant tumours of the oesophagus	12	1	1	0	0	4	1	6	6	2	4	4	6	6	5	3	3	4	1	4	6	3	3	4	6	1	3	3	3	6	5	6	2	5	1	4	6	6	3	6	6	4	1
330	0	50	1	3	1	Nasopharyngeal cancer lung metastasis	68	1	1	1	1	1	6	6	6	6	6	6	6	6	6	6	6	6	1	6	6	6	6	6	6	1	1	6	6	6	6	6	6	6	1	6	6	6	6	6	6	6	3
331	0	66	2	1	3	Malignant tumour of the gums	62	1	1	1	0	1	3	6	3	3	5	5	3	6	4	3	2	4	1	6	5	3	3	5	6	1	3	4	6	6	6	4	3	5	1	4	6	6	6	6	6	6	2
332	0	66	1	1	1	Malignant tumour of the ovary	60	1	1	0	0	4	6	6	6	6	6	6	6	1	1	6	6	6	6	6	6	6	6	6	6	1	6	6	6	6	6	6	6	6	1	6	6	6	6	6	6	6	1
333	0	69	2	1	3	Malignant tumour of the tongue	72	0	0	0	1	1	6	6	6	6	6	6	6	6	1	6	6	6	6	6	6	6	6	6	6	1	6	6	6	6	6	6	6	6	1	6	1	6	6	6	6	6	1
334	0	67	1	1	2	Mediastinal metastasis from a malignant tumour of the lung	26	0	1	1	0	4	6	6	6	6	6	6	6	5	6	6	6	2	6	6	6	6	5	6	6	3	6	2	6	6	6	6	6	6	1	6	6	6	6	6	6	6	2
335	1	75	3	1	3	Malignant tumour of the colon	28	1	1	0	0	2	6	6	6	6	6	6	6	6	1	6	6	4	5	6	6	6	6	6	6	2	6	1	6	6	6	6	6	6	1	6	6	6	6	6	6	6	2
336	1	76	4	1	2	Mediastinal metastasis from a malignant tumour of the lung	33	1	1	0	1	1	6	6	6	6	6	6	6	6	6	6	6	1	6	6	6	6	6	6	6	1	6	6	6	6	6	6	6	6	1	6	6	6	6	6	6	6	1
337	0	52	3	1	2	Malignant tumour of the nasopharynx	24	0	1	0	0	2	6	6	6	6	6	6	6	6	6	2	6	1	1	6	6	6	6	6	6	1	6	1	6	6	3	6	1	6	1	6	6	6	6	6	6	6	4
338	0	70	2	4	2	Malignant tumour of the nasopharynx	4	1	0	1	0	2	6	6	6	6	6	6	6	6	1	5	6	5	1	6	6	6	6	6	6	2	6	1	6	6	6	6	2	6	1	6	6	5	6	5	6	6	2
339	1	43	3	4	2	Malignant tumour of the nasopharynx	6	1	0	1	0	5	6	6	6	6	6	6	6	6	6	6	6	6	6	6	6	6	6	6	6	1	6	6	6	6	6	6	3	6	4	6	6	6	6	6	6	6	6
340	1	55	3	1	3	Mediastinal metastasis from a malignant tumour of the lung	6	0	1	0	1	1	6	6	6	6	6	6	6	6	1	6	6	1	4	6	6	6	6	6	6	3	6	1	6	6	6	6	6	6	6	6	6	6	6	6	6	6	3
341	1	55	2	1	1	Mediastinal metastasis from a malignant tumour of the lung	8	0	1	0	1	4	6	1	6	6	6	6	6	6	6	6	6	6	6	6	6	6	6	6	6	1	6	6	6	6	6	6	6	6	1	6	6	6	6	6	6	6	6
342	1	61	2	1	3	Mediastinal metastasis from a malignant tumour of the lung	12	0	1	0	0	2	3	2	3	3	1	1	1	1	1	4	3	6	1	4	1	3	1	4	4	3	3	4	3	3	4	6	4	1	3	3	3	4	3	4	4	6	1
343	1	60	3	1	2	Malignant tumour of the colon	36	1	1	0	0	1	6	1	1	1	1	6	1	1	6	6	1	6	6	6	6	1	1	6	6	1	1	6	1	1	6	6	6	1	1	1	1	6	1	6	6	6	1
344	1	64	2	1	1	Malignant tumour of the colon	22	0	1	0	0	4	5	5	2	3	3	4	3	3	4	4	5	5	5	4	4	3	3	4	4	2	5	5	5	5	4	4	4	3	3	3	3	4	3	5	5	5	2
345	1	66	3	1	2	Malignant tumours of the lungs Malignant tumours of the rectum	4	0	0	0	1	3	6	6	6	6	6	6	6	6	1	6	6	3	1	6	6	6	6	6	6	2	6	1	6	6	6	6	5	6	1	6	6	6	6	6	6	6	2
346	1	66	2	1	2	Malignant tumour of the colon	48	1	1	1	1	2	3	5	6	6	1	6	6	5	2	6	1	3	6	1	6	6	1	1	2	1	1	3	4	4	3	6	6	6	1	5	6	1	4	3	6	6	6
347	0	70	1	4	2	Malignant tumour of the colon	27	0	1	0	0	5	3	4	4	4	4	3	4	4	3	3	4	3	3	3	3	4	4	3	3	4	4	3	4	4	3	3	3	4	4	4	4	3	4	3	3	3	4
348	0	58	2	1	2	Malignant tumours of the lungs	7	0	1	0	0	3	5	4	3	4	5	5	4	3	4	4	4	3	3	6	2	3	5	4	2	4	5	3	4	4	4	6	3	4	4	5	6	3	4	3	5	4	3
349	1	71	2	1	1	Multiple metastases from lung occupations	5	0	1	0	0	3	6	1	1	1	1	6	1	1	6	6	1	6	6	6	6	1	1	6	6	1	1	6	1	1	6	6	6	1	1	1	1	6	1	6	6	6	1
350	1	43	3	4	2	Malignant tumour of the nasopharynx	6	1	0	1	0	5	6	6	6	6	6	6	6	6	6	6	6	6	6	6	6	6	6	6	6	1	6	6	6	6	6	6	3	6	4	6	6	6	6	6	6	6	6
351	1	55	3	1	3	Mediastinal metastasis from a malignant tumour of the lung	6	0	1	0	1	1	6	6	6	6	6	6	6	6	1	6	6	1	4	6	6	6	6	6	6	3	6	1	6	6	6	6	6	6	6	6	6	6	6	6	6	6	3
352	1	55	2	1	1	Mediastinal metastasis from a malignant tumour of the lung	8	0	1	0	1	4	6	1	6	6	6	6	6	6	6	6	6	6	6	6	6	6	6	6	6	1	6	6	6	6	6	6	6	6	1	6	6	6	6	6	6	6	6
353	1	61	2	1	3	Mediastinal metastasis from a malignant tumour of the lung	12	0	1	0	0	2	3	2	3	3	1	1	1	1	1	4	3	6	1	4	1	3	1	4	4	3	3	4	3	3	4	6	4	1	3	3	3	4	3	4	4	6	1
354	1	60	3	1	2	Malignant tumour of the colon	36	1	1	0	0	1	6	1	1	1	1	6	1	1	6	6	1	6	6	6	6	1	1	6	6	1	1	6	1	1	6	6	6	1	1	1	1	6	1	6	6	6	1
355	1	64	2	1	1	Malignant tumour of the colon	22	0	1	0	0	4	5	5	2	3	3	4	3	3	4	4	5	5	5	4	4	3	3	4	4	2	5	5	5	5	4	4	4	3	3	3	3	4	3	5	5	5	2
356	1	66	3	1	2	Malignant tumours of the lungs Malignant tumours of the rectum	4	0	0	0	1	3	6	6	6	6	6	6	6	6	1	6	6	3	1	6	6	6	6	6	6	2	6	1	6	6	6	6	5	6	1	6	6	6	6	6	6	6	2
357	1	66	2	1	2	Malignant tumour of the colon	48	1	1	1	1	2	3	5	6	6	1	6	6	5	2	6	1	3	6	1	6	6	1	1	2	1	1	3	4	4	3	6	6	6	1	5	6	1	4	3	6	6	6
358	0	70	1	4	2	Malignant tumour of the colon	27	0	1	0	0	5	3	4	4	4	4	3	4	4	3	3	4	3	3	3	3	4	4	3	3	4	4	3	4	4	3	3	3	4	4	4	4	3	4	3	3	3	4
359	0	58	2	1	2	Malignant tumours of the lungs	7	0	1	0	0	3	5	4	3	4	5	5	4	3	4	4	4	3	3	6	2	3	5	4	2	4	5	3	4	4	4	6	3	4	4	5	6	3	4	3	5	4	3
360	1	71	2	1	1	Multiple metastases from lung occupations	5	0	1	0	0	3	6	1	1	1	1	6	1	1	6	6	1	6	6	6	6	1	1	6	6	1	1	6	1	1	6	6	6	1	1	1	1	6	1	6	6	6	1
[truncated: 12 more columns]

## Sheet: Description
Variable	Characteristics in Table2	Nominal	Description
sex	Gender	0	female
		1	male
year	Age(years)
edu	Educational level	1	Junior high school or below
		2	High/Vocational high/Technical sec- ondary school
		3	Associate degree/Bachelor’s degree
		4	Master’s degree or above
marry	Marital Status	1	Married
		2	Single
		3	Divorced
		4	Widowed
cons	Medical Expenses	1	Basic medical insurance
		2	Public medical care
		3	Cooperative medical care
		4	Out-of-pocket
diag	Disease Diagnosis	1	Surgery history
oper	Operation History	0	No operation history
		1	Operation history
chem	Chemotherapy History	0	No chemotherapy history
		1	Chemotherapy history
radio	Radiotherapy History	0	No radiotherapy history
		1	Radiotherapy history
lied	Life Education	0	No life education received
		1	Life education received
long	Duration of Disease
work	Type of Previous Occupation	1	Manager
		2	Technician
		3	Staff
		4	Farmer
		5	Unemployed
