# Supplementary material for: Adaptation and validation of the Chinese version of the Hospice Comfort Questionnaire-Patient (HCQ-P)
Source: PeerJ. 2025 Jun 10;13:e19562. doi: 10.7717/peerj.19562 (PMC12164812; doi:10.7717/peerj.19562)
Supplement: Supplemental Information 2 [file peerj-13-19562-s002.xlsx]

## Sheet: Data
id	Q1	Q2	Q5	Q12	Q14	Q16	Q19	Q27	Q29	Q31	Q34	Q3	Q7	Q9	Q15	Q17	Q22	Q35	Q36	Q39	Q40	Q41	Q43	Q45	Q46	Q11	Q18	Q21	Q25	Q30	Q32	Q33	Q38	Q42	Q49	Q4	Q6	Q8	Q10	Q13	Q20	Q23	Q24	Q26	Q28	Q37	Q44	Q47	Q48
1	2	4	6	2	1	3	6	2	4	2	4	4	6	6	5	6	6	5	4	3	6	2	6	6	6	2	1	6	1	6	3	4	4	6	5	5	5	5	6	6	6	5	2	3	5	6	6	5	5
2	6	6	6	6	6	6	6	1	6	1	6	6	6	6	6	6	6	6	6	1	6	6	6	6	1	6	6	6	1	6	6	6	6	6	6	6	1	6	6	6	6	6	1	1	6	6	6	6	6
3	3	4	5	2	4	4	4	3	5	3	5	3	1	6	5	6	3	5	6	1	6	2	6	6	6	4	2	6	1	4	3	1	3	5	4	6	4	2	6	4	6	6	2	2	6	6	4	6	6
4	5	6	1	6	5	6	4	1	4	5	4	1	6	6	6	6	6	6	6	3	5	6	6	6	6	6	1	6	3	4	4	4	5	3	4	6	6	6	6	5	4	5	4	4	5	6	4	6	6
5	3	3	6	4	3	1	6	6	6	2	5	5	1	6	2	6	2	6	6	1	6	1	6	6	6	1	1	6	1	3	6	2	6	4	4	6	2	4	6	3	6	6	6	1	6	5	5	6	6
6	5	5	5	2	6	2	4	5	5	1	4	4	1	6	2	5	3	5	6	3	4	2	6	6	6	2	1	6	1	5	5	2	4	4	6	6	5	6	6	6	5	6	2	2	4	4	6	6	1
7	3	2	5	2	4	3	5	5	5	2	5	3	1	6	1	6	4	6	6	2	6	1	6	5	5	1	1	5	1	5	2	1	3	3	4	5	1	3	6	5	5	6	5	2	6	5	6	6	6
8	1	6	6	1	4	6	4	4	3	1	4	6	6	6	1	6	3	6	3	1	4	3	4	4	6	3	6	6	1	4	3	3	6	3	5	6	1	6	6	4	6	6	1	4	5	3	6	6	6
9	5	6	5	6	3	3	3	2	5	2	6	3	1	3	4	6	2	5	6	1	2	2	5	6	2	5	3	5	1	4	3	2	3	3	4	6	1	5	6	3	6	6	1	3	6	3	5	6	6
10	3	6	1	6	3	1	6	6	6	3	6	6	6	6	6	6	6	6	6	1	6	5	6	6	6	6	3	4	1	5	2	5	6	2	6	6	6	6	6	6	6	6	5	4	6	6	6	6	6
11	4	2	3	3	3	5	3	3	4	4	2	1	4	1	3	3	3	4	4	3	3	5	3	4	4	5	5	5	1	3	3	5	3	5	4	5	1	5	6	2	6	6	2	1	4	5	5	5	3
12	5	6	5	5	6	5	5	5	5	3	6	6	5	5	5	6	6	5	6	1	5	3	6	5	3	5	4	6	1	5	5	5	6	6	6	6	1	4	6	6	6	6	2	1	6	6	6	6	6
13	2	2	2	2	3	2	6	1	5	2	5	1	4	6	3	6	2	6	6	1	4	4	6	6	6	2	1	6	1	3	5	4	6	6	6	5	6	4	6	2	6	2	1	2	5	5	6	6	6
14	6	5	4	6	4	6	6	5	4	2	2	6	2	5	5	4	5	3	6	2	5	6	4	3	6	4	6	3	4	2	3	6	3	5	4	5	3	6	6	6	6	5	1	1	6	6	6	5	6
15	6	6	6	3	1	5	3	1	6	6	6	6	5	5	6	6	5	6	6	1	5	6	5	6	6	3	4	6	1	5	1	6	6	6	6	6	5	6	6	2	6	6	5	4	6	6	6	6	6
16	3	4	4	5	2	4	4	4	2	2	4	3	2	4	3	4	6	2	2	2	4	3	6	5	3	3	2	5	4	5	4	1	3	4	4	5	4	4	4	3	3	3	2	3	4	5	4	2	4
17	5	6	3	4	2	5	6	2	3	4	3	5	6	2	6	6	6	5	6	6	6	1	5	5	5	2	3	6	1	6	3	3	6	3	1	6	4	6	6	4	5	6	4	1	6	6	6	6	6
18	6	6	6	6	2	5	3	6	1	3	2	2	3	6	1	6	1	1	6	5	4	1	6	6	6	1	1	2	1	5	5	4	6	6	2	6	1	6	6	4	6	6	6	6	6	6	6	6	6
19	6	6	5	2	1	3	2	2	1	6	6	6	1	6	6	6	4	3	6	1	3	1	2	4	6	6	1	6	1	5	3	6	6	6	6	1	1	6	6	4	6	6	6	1	6	6	6	1	6
20	6	5	6	6	4	6	3	3	5	3	5	4	3	6	6	5	2	5	6	1	3	1	5	4	3	5	2	4	1	3	2	2	3	3	4	6	3	4	6	5	6	6	2	1	6	4	4	6	4
21	4	6	5	6	4	4	2	3	5	3	4	4	1	6	4	3	3	6	6	1	3	1	3	4	3	3	1	3	2	2	3	1	2	3	4	5	3	3	5	4	6	5	4	4	5	4	3	5	4
22	5	6	6	6	5	5	5	4	5	4	4	6	1	6	6	4	2	6	6	1	5	1	3	5	5	4	1	3	1	1	2	2	1	3	5	6	3	5	6	3	6	6	2	1	5	4	5	6	6
23	6	6	6	6	4	6	6	3	4	4	6	6	4	6	4	3	3	6	6	1	3	2	6	6	4	5	3	5	1	5	3	3	4	3	4	6	1	5	6	5	6	6	2	1	6	5	2	6	4
24	2	1	6	3	5	1	6	6	6	3	4	6	2	5	3	6	6	6	6	1	2	2	6	6	6	5	5	6	3	6	5	4	6	5	6	6	6	5	6	2	6	6	3	2	6	6	6	6	6
25	4	6	6	3	6	5	6	3	5	5	2	4	1	5	5	4	6	5	6	1	4	4	3	3	4	4	1	6	1	4	5	3	3	3	5	4	5	4	6	4	5	6	1	1	4	6	4	5	5
26	6	6	6	6	6	6	6	6	6	6	6	6	1	6	6	6	6	6	6	1	6	6	6	6	6	6	6	6	1	6	6	6	6	6	6	6	6	6	6	6	6	6	1	1	6	6	6	6	6
27	6	6	6	6	6	6	6	6	6	3	6	3	1	6	6	6	6	6	6	1	6	6	6	6	6	6	3	6	1	6	4	4	4	4	4	6	6	6	6	6	6	6	6	1	6	6	6	6	6
28	6	1	6	5	6	2	5	5	3	3	5	6	1	6	3	5	5	4	3	2	5	3	3	5	3	4	2	6	4	5	4	3	4	3	3	5	4	4	6	5	3	3	4	6	3	5	4	3	5
29	6	6	6	6	6	6	6	6	6	6	6	6	1	6	6	6	6	6	6	1	6	6	6	6	6	6	6	6	1	6	6	6	6	6	6	6	6	6	6	6	6	6	6	1	6	6	6	6	6
30	6	6	6	6	6	6	6	6	2	5	5	6	1	6	6	6	6	6	6	1	5	6	6	6	6	6	5	6	1	5	6	6	6	6	6	6	6	6	6	6	6	6	6	1	6	6	6	6	6
31	4	5	6	4	4	3	5	5	2	2	5	2	1	6	3	5	5	2	2	5	5	3	5	5	2	3	2	6	5	5	5	2	5	2	2	2	5	2	6	4	2	2	5	5	2	2	2	2	5
32	4	5	4	2	4	4	3	6	5	3	3	4	1	6	5	6	4	4	6	1	3	4	6	5	6	6	2	4	1	4	6	6	5	6	6	6	2	6	6	6	6	6	1	1	6	6	6	6	6
33	1	6	6	2	4	4	6	6	5	3	3	4	1	4	6	3	3	4	6	1	3	3	3	6	5	6	2	5	1	4	6	6	3	6	6	4	1	6	4	4	4	4	1	1	6	6	6	5	3
34	6	6	6	6	6	6	6	6	6	6	6	6	1	6	6	6	6	6	6	1	1	6	6	6	6	6	6	6	1	6	6	6	6	6	6	6	3	6	6	6	6	6	1	1	6	6	6	6	6
35	3	6	3	3	5	5	3	6	4	3	2	4	1	6	5	3	3	5	6	1	3	4	6	6	6	4	3	5	1	4	6	6	6	6	6	6	2	6	6	6	6	6	1	1	6	6	6	6	3
36	6	6	6	6	6	6	6	1	1	6	6	6	6	6	6	6	6	6	6	1	6	6	6	6	6	6	6	6	1	6	6	6	6	6	6	6	1	6	6	6	6	6	6	1	6	6	6	6	6
37	6	6	6	6	6	6	6	6	1	6	6	6	6	6	6	6	6	6	6	1	6	6	6	6	6	6	6	6	1	6	1	6	6	6	6	6	1	6	6	6	6	6	6	1	6	6	6	6	6
38	6	6	6	6	6	6	6	5	6	6	6	2	6	6	6	6	5	6	6	3	6	2	6	6	6	6	6	6	1	6	6	6	6	6	6	6	2	6	6	6	6	6	6	4	6	6	6	6	6
39	6	6	6	6	6	6	6	6	1	6	6	4	5	6	6	6	6	6	6	2	6	1	6	6	6	6	6	6	1	6	6	6	6	6	6	6	2	5	6	6	6	6	6	3	6	6	6	6	6
40	6	6	6	6	6	6	6	6	6	6	6	1	6	6	6	6	6	6	6	1	6	6	6	6	6	6	6	6	1	6	6	6	6	6	6	6	1	6	6	6	6	6	6	1	6	6	6	6	6
41	6	6	6	6	6	6	6	6	6	2	6	1	1	6	6	6	6	6	6	1	6	1	6	6	3	6	1	6	1	6	6	6	6	6	6	6	4	6	6	6	6	6	6	5	6	6	6	6	6
42	6	6	6	6	6	6	6	6	1	5	6	5	1	6	6	6	6	6	6	2	6	1	6	6	6	6	2	6	1	6	6	5	6	5	6	6	2	5	6	1	6	6	6	3	6	6	6	6	6
43	6	6	6	6	6	6	6	6	6	6	6	6	6	6	6	6	6	6	6	1	6	6	6	6	6	6	3	6	4	6	6	6	6	6	6	6	6	6	6	6	6	1	6	4	6	6	6	6	6
44	6	6	6	6	6	6	6	6	1	6	6	1	4	6	6	6	6	6	6	3	6	1	6	6	6	6	6	6	6	6	6	6	6	6	6	6	3	6	6	6	6	6	4	3	6	6	6	6	6
45	6	1	6	6	6	6	6	6	6	6	6	6	6	6	6	6	6	6	6	1	6	6	6	6	6	6	6	6	1	6	6	6	6	6	6	6	6	6	6	6	6	6	1	6	6	6	6	6	6
46	3	2	3	3	1	1	1	1	1	4	3	6	1	4	1	3	1	4	4	3	3	4	3	3	4	6	4	1	3	3	3	4	3	4	4	6	1	6	6	6	6	6	1	1	4	6	4	4	5
47	6	1	1	1	1	6	1	1	6	6	1	6	6	6	6	1	1	6	6	1	1	6	1	1	6	6	6	1	1	1	1	6	1	6	6	6	1	6	6	1	6	6	1	1	6	6	6	6	1
48	5	5	2	3	3	4	3	3	4	4	5	5	5	4	4	3	3	4	4	2	5	5	5	5	4	4	4	3	3	3	3	4	3	5	5	5	2	4	4	6	4	4	3	3	4	4	5	5	2
49	6	6	6	6	6	6	6	6	1	6	6	3	1	6	6	6	6	6	6	2	6	1	6	6	6	6	5	6	1	6	6	6	6	6	6	6	2	5	6	6	6	6	6	3	6	6	6	6	6
50	3	5	6	6	1	6	6	5	2	6	1	3	6	1	6	6	1	1	2	1	1	3	4	4	3	6	6	6	1	5	6	1	4	3	6	6	6	6	6	6	2	6	1	1	2	5	6	6	5
51	3	4	4	4	4	3	4	4	3	3	4	3	3	3	3	4	4	3	3	4	4	3	4	4	3	3	3	4	4	4	4	3	4	3	3	3	4	3	3	4	3	3	4	4	3	3	3	3	4
52	5	4	3	4	5	5	4	3	4	4	4	3	3	6	2	3	5	4	2	4	5	3	4	4	4	6	3	4	4	5	6	3	4	3	5	4	3	5	6	6	6	3	3	3	4	2	3	3	4
53	6	1	1	1	1	6	1	1	6	6	1	6	6	6	6	1	1	6	6	1	1	6	1	1	6	6	6	1	1	1	1	6	1	6	6	6	1	6	6	1	6	6	1	1	6	6	6	6	1
54	6	6	6	6	6	6	6	6	6	6	6	6	1	6	6	6	6	6	6	2	6	1	6	6	6	6	6	6	1	6	6	6	6	6	6	6	2	6	6	1	6	6	6	3	6	6	6	6	6
55	6	6	5	6	6	6	6	6	4	6	6	6	6	6	6	6	6	4	6	6	6	4	6	6	6	6	6	6	1	6	6	6	6	6	6	4	2	6	6	1	6	6	1	6	4	3	6	6	6
56	6	1	6	6	6	5	6	6	6	6	6	6	6	6	5	6	6	6	5	1	6	3	6	6	6	6	5	6	1	6	6	6	6	6	6	6	6	6	6	6	6	6	6	5	6	6	6	6	6
57	6	5	6	6	6	6	6	4	6	4	6	6	6	6	6	6	6	6	6	4	6	3	6	6	6	6	6	6	1	6	6	6	6	3	6	6	6	6	6	6	6	6	3	4	6	5	6	6	1
58	6	6	6	6	6	6	6	1	6	6	6	6	6	6	6	6	6	6	6	1	6	6	6	6	6	6	1	6	1	6	6	6	6	6	6	6	1	6	6	6	6	6	6	1	6	6	6	6	6
59	6	6	6	1	6	6	6	6	6	6	6	6	6	6	6	6	6	6	6	1	6	6	6	6	6	6	6	6	1	6	6	6	6	6	6	6	6	6	6	6	6	6	6	3	6	6	6	6	6
60	6	6	6	6	6	6	6	6	6	6	6	6	6	6	6	6	6	6	6	1	6	6	6	6	6	6	6	6	1	6	6	6	6	6	6	6	1	6	6	6	6	6	6	1	6	6	6	6	1
61	4	6	6	6	6	6	6	2	6	6	6	6	6	6	6	6	6	6	6	1	6	6	6	6	6	6	6	6	1	6	6	6	6	6	6	5	5	6	6	6	6	6	6	6	4	6	6	6	6
62	6	6	6	6	6	6	6	4	3	3	4	6	6	6	6	6	6	3	3	4	4	3	4	4	3	6	3	6	4	4	4	3	4	3	3	6	6	6	6	6	6	6	6	4	3	3	3	3	4
63	5	5	5	5	6	5	5	4	4	5	5	5	2	5	5	5	5	4	5	3	6	5	5	5	5	5	4	5	2	5	5	4	4	5	3	5	5	4	5	5	5	5	5	4	4	4	4	4	5
64	4	1	2	2	2	6	3	1	5	4	3	5	5	5	5	3	1	5	5	2	2	4	2	3	4	5	4	3	2	3	3	4	3	5	5	5	2	5	5	2	5	4	3	2	5	3	5	4	2
65	6	1	1	1	1	6	1	1	6	6	1	6	6	6	6	1	1	6	6	1	1	6	1	1	6	6	6	1	1	1	1	6	1	6	6	6	1	6	6	1	6	6	1	1	6	6	6	6	1
66	6	6	6	6	6	1	6	5	6	6	6	6	6	6	6	6	6	6	6	1	6	6	6	6	5	6	5	6	1	6	6	6	6	6	6	6	6	6	6	6	6	6	6	1	6	6	6	5	6
67	6	1	6	6	6	6	6	6	6	6	6	6	6	6	6	6	6	6	6	1	6	6	6	6	6	6	4	6	6	6	6	6	6	6	6	6	6	6	6	6	6	6	6	1	6	6	6	6	6
68	6	2	6	6	6	6	6	5	6	6	6	5	6	6	6	6	6	6	6	1	6	2	6	6	5	6	5	6	1	6	6	6	6	6	5	4	5	6	6	6	5	5	6	6	5	6	6	5	6
69	3	6	6	6	6	5	6	4	6	4	5	6	3	6	6	6	6	5	6	1	5	5	5	2	5	6	6	6	1	6	3	4	6	6	5	6	6	6	6	6	5	6	6	1	6	6	5	5	2
70	6	6	6	6	6	6	6	6	6	6	6	6	6	6	6	6	6	6	6	1	6	6	6	6	6	6	6	6	1	6	6	6	6	6	6	6	6	6	6	6	6	6	6	1	6	6	6	6	6
71	5	6	6	6	6	4	6	6	3	5	6	4	4	5	5	6	6	4	4	2	6	5	6	6	4	5	4	6	2	6	6	4	6	5	4	5	6	5	5	6	4	5	6	3	5	5	5	4	6
72	3	4	5	3	2	4	2	5	2	4	3	1	2	2	2	5	2	2	4	5	3	2	5	5	4	2	5	5	2	5	5	5	3	4	2	4	3	5	4	5	4	4	5	5	4	2	4	2	3
73	6	1	6	6	6	6	6	6	6	6	1	6	6	6	6	6	6	6	6	1	6	4	6	6	6	6	6	6	1	6	6	6	6	6	6	6	6	6	6	6	6	6	6	1	6	6	6	6	6
74	5	3	4	3	4	4	4	3	2	2	3	4	4	2	4	4	3	4	5	2	4	4	4	4	3	4	5	5	4	5	5	4	3	5	4	2	3	3	4	4	4	4	4	3	4	4	4	4	4
75	6	6	6	6	6	6	6	6	6	6	6	6	1	6	6	6	6	6	6	1	6	6	6	6	6	6	6	6	1	6	6	6	6	6	6	6	6	6	6	6	6	6	6	1	1	6	6	6	6
76	6	4	4	4	4	3	4	3	3	3	4	5	3	5	3	4	5	3	3	4	4	3	4	5	3	5	2	5	4	4	4	3	4	3	3	2	2	3	5	2	5	2	5	4	3	3	3	2	5
77	6	6	6	6	6	6	6	6	6	6	6	6	6	6	6	6	6	6	6	1	6	6	6	6	6	6	6	6	1	6	6	6	6	6	6	6	1	6	6	6	6	6	6	1	6	6	6	6	1
78	6	1	5	1	5	6	5	6	5	5	6	6	6	6	6	6	6	5	6	2	5	4	5	5	4	6	2	6	1	6	5	5	5	3	5	6	6	6	6	6	6	6	6	5	5	5	5	5	5
79	6	6	6	1	6	5	6	4	6	3	6	2	1	3	4	6	4	5	4	4	4	3	4	4	3	6	1	6	1	6	6	5	4	3	3	2	6	6	5	6	6	5	2	1	6	3	3	3	4
80	5	4	3	3	3	4	3	3	2	4	3	3	4	3	4	4	5	3	4	3	3	3	4	5	4	4	3	3	3	4	3	2	4	5	3	4	3	3	4	3	3	3	3	5	4	4	4	4	3
81	6	6	6	6	6	6	6	5	5	6	6	4	4	6	5	6	6	5	5	4	6	4	6	6	4	6	5	6	1	6	6	6	6	6	6	4	5	4	6	6	5	6	5	6	5	5	4	5	6
82	3	4	4	5	6	3	4	2	3	3	4	3	4	3	3	5	4	3	3	5	5	1	5	5	2	3	4	4	4	4	4	3	4	3	3	4	4	3	3	5	3	3	4	1	4	4	2	2	6
83	6	1	6	6	6	6	6	4	3	3	4	6	1	6	6	6	4	3	3	4	4	3	4	4	3	6	1	4	4	4	4	3	4	3	3	6	6	5	6	6	3	3	4	4	3	3	3	3	4
84	6	3	1	3	1	3	1	1	6	4	4	3	3	3	6	1	1	6	4	4	2	6	4	1	4	6	3	1	2	3	1	3	3	4	6	6	3	6	4	3	6	3	4	3	4	6	4	3	2
85	6	2	2	2	3	6	3	2	5	5	2	4	3	5	4	2	2	5	4	2	4	4	2	2	4	6	4	1	2	3	2	4	3	4	5	4	2	4	3	1	4	4	2	3	5	5	5	5	2
86	4	6	6	6	6	6	1	6	1	1	3	6	6	6	6	6	1	4	4	3	3	4	3	3	4	1	1	1	1	1	3	4	3	4	5	6	6	1	6	1	6	1	6	6	6	4	4	4	3
87	6	6	6	6	6	6	6	6	5	5	6	6	6	6	6	6	6	6	5	1	6	4	6	6	5	6	3	6	2	6	6	6	6	6	5	6	6	6	6	6	6	5	6	1	4	5	5	4	6
88	5	6	6	6	6	6	6	5	1	4	6	4	5	6	6	6	6	5	5	2	6	3	6	6	5	6	6	6	1	6	5	5	6	6	6	5	6	6	6	6	6	4	6	1	5	5	6	5	6
89	5	6	6	6	6	5	6	5	6	4	6	5	5	6	6	6	6	5	1	3	6	3	6	6	4	6	4	6	1	6	6	6	4	6	6	5	5	6	6	6	5	5	6	1	5	4	6	5	6
90	3	3	5	5	4	2	3	4	3	3	4	3	4	3	2	4	3	3	3	4	4	3	5	4	3	3	3	4	3	4	4	3	4	4	3	5	5	3	4	4	3	4	3	3	3	3	4	3	5
91	5	2	4	4	5	5	5	4	4	4	4	5	6	6	5	3	4	5	5	3	5	6	6	5	6	6	3	6	2	4	5	5	5	5	6	5	1	6	6	6	5	6	6	4	5	5	6	6	6
92	6	6	6	6	6	6	6	6	3	4	4	6	6	6	6	6	2	5	3	1	6	2	6	6	6	6	6	6	1	6	6	6	6	6	6	6	5	6	6	6	3	6	4	1	6	6	4	6	5
93	5	5	5	4	4	4	4	4	4	4	4	3	3	5	4	3	3	4	5	3	5	5	4	5	4	5	3	5	2	3	3	2	5	5	4	4	4	5	5	4	4	4	3	4	3	2	5	4	5
94	3	4	4	4	4	3	4	3	4	4	3	3	3	3	3	4	4	4	4	3	3	4	3	3	4	3	3	4	3	3	3	4	3	4	4	3	4	3	3	4	3	4	3	3	4	4	4	4	3
95	4	3	3	3	3	4	3	4	3	3	4	4	4	4	4	3	3	3	3	3	4	3	3	3	4	4	4	3	4	4	4	3	4	4	4	4	3	3	4	3	4	3	4	4	3	3	4	4	3
96	6	6	6	6	6	6	6	6	6	6	6	6	6	6	6	6	6	6	6	1	6	6	6	6	6	6	6	6	1	6	6	6	6	6	6	6	1	6	6	6	6	6	6	1	6	6	6	6	1
97	5	6	4	4	3	4	5	4	4	4	3	3	4	4	4	5	3	3	4	1	5	3	3	4	2	4	1	4	5	5	4	4	4	5	4	3	3	3	5	4	3	5	3	5	2	4	4	3	5
98	6	6	6	6	6	6	6	6	6	6	6	6	6	6	6	6	6	6	6	1	6	6	6	6	6	6	6	6	1	6	6	6	6	6	6	6	1	6	6	6	6	6	6	1	6	6	6	6	1
99	6	1	1	6	6	6	6	5	6	6	6	6	6	6	6	6	6	6	6	1	6	6	6	6	6	6	6	6	1	6	6	6	6	6	6	6	1	6	6	6	6	6	6	1	6	6	6	6	6
100	6	6	6	6	5	6	6	5	3	6	1	5	5	6	5	6	6	5	5	1	6	4	6	6	3	6	4	6	1	6	5	4	6	6	6	6	6	6	6	6	4	6	6	1	6	5	6	5	5
101	6	1	1	1	1	6	1	1	6	6	1	6	6	6	6	1	1	6	6	1	2	6	1	1	6	6	6	1	1	1	1	6	1	6	6	6	1	6	6	1	6	6	1	1	6	6	6	6	1
102	6	6	6	6	6	6	5	3	6	6	5	6	6	6	6	5	6	6	2	1	5	6	5	5	5	6	6	6	1	5	5	6	5	6	6	6	6	6	6	6	6	6	5	3	6	6	6	5	5
103	6	6	6	6	6	6	6	6	6	6	6	6	6	6	6	6	6	6	6	1	6	6	6	6	6	6	6	6	1	6	6	6	6	6	6	6	6	6	6	6	6	6	6	1	6	6	6	6	1
104	4	4	4	3	4	3	3	3	4	4	3	3	4	3	3	3	3	4	4	3	3	4	3	3	4	3	4	3	3	3	3	4	3	4	4	3	4	3	3	4	4	4	3	3	4	4	4	4	3
105	6	5	6	5	6	2	4	5	4	4	4	6	6	6	6	6	3	6	6	1	6	6	4	5	5	6	1	3	3	3	3	4	1	4	6	6	6	6	6	6	6	6	1	6	6	5	4	6	6
106	6	6	6	6	6	6	6	3	5	5	6	6	6	6	6	6	6	6	5	4	6	6	5	6	6	6	5	6	1	6	6	6	6	6	6	6	4	6	6	6	6	6	3	2	6	6	6	6	6
107	3	4	5	4	5	3	5	5	3	2	5	4	2	2	2	5	5	2	3	3	5	3	4	4	3	2	2	4	5	5	5	3	4	2	3	4	2	3	3	4	2	3	5	4	3	3	4	4	5
108	4	3	3	3	3	4	3	3	4	3	4	4	4	4	4	3	3	3	3	3	3	3	3	3	4	4	4	3	3	4	4	3	3	4	4	4	3	4	4	3	4	4	3	3	4	4	3	4	4
109	6	1	1	1	1	6	1	1	6	6	1	6	6	6	6	1	1	6	6	1	1	6	1	1	6	6	6	1	1	1	1	6	1	6	6	6	1	6	6	1	6	6	1	1	6	6	6	6	1
110	6	6	6	6	4	6	6	5	5	6	5	6	6	6	5	6	6	6	6	1	6	6	5	5	6	6	3	1	1	5	5	6	5	6	6	6	6	6	6	6	6	6	5	1	6	6	6	6	5
111	3	3	4	4	4	3	4	4	3	3	5	4	3	3	4	4	4	3	3	4	4	2	4	4	3	3	3	4	5	5	5	3	4	3	3	3	3	4	4	4	2	2	3	4	3	3	3	3	4
112	6	1	1	1	1	6	1	1	6	6	1	6	6	6	6	1	1	6	6	1	1	6	1	1	5	6	6	1	1	1	2	6	1	6	5	6	1	6	6	1	6	6	1	1	6	6	6	5	2
113	3	4	2	3	4	2	4	4	4	5	2	1	1	3	4	5	4	3	3	3	3	1	3	4	3	3	3	4	4	2	2	1	2	1	1	2	4	1	3	4	3	2	5	4	3	1	4	1	6
114	4	3	3	3	3	4	3	3	4	4	3	4	4	4	4	3	3	4	4	4	3	4	3	3	3	4	4	3	3	3	3	4	3	3	4	4	3	4	4	3	4	4	3	3	4	4	4	4	3
115	5	5	5	5	5	5	6	2	5	5	5	5	5	5	5	5	6	5	5	5	6	4	5	6	5	5	3	6	2	5	4	4	4	4	5	6	5	5	6	5	6	6	5	3	6	5	5	5	5
116	5	6	5	5	5	1	6	1	1	6	6	6	6	6	6	6	1	6	6	1	6	1	6	6	6	6	6	6	1	6	6	6	6	6	6	6	5	6	6	5	6	6	6	1	6	6	6	6	6
117	6	6	6	6	6	6	6	6	1	6	6	6	6	6	6	6	6	6	6	6	6	1	6	6	6	6	6	6	1	6	6	6	6	6	6	6	6	6	6	6	6	6	6	1	6	6	6	6	6
118	4	3	3	3	3	4	3	3	4	4	3	4	4	4	4	3	3	4	4	3	3	4	3	3	4	4	4	3	3	3	3	4	3	4	4	4	3	4	4	3	4	4	3	3	4	4	4	4	3
119	6	4	4	5	5	4	6	5	4	4	5	6	6	6	5	5	5	4	4	5	5	4	5	5	4	4	3	5	3	4	3	4	6	2	2	6	5	6	4	5	4	4	5	4	4	4	3	2	5
120	6	3	4	6	6	6	1	1	6	6	1	6	6	6	6	6	6	6	6	4	5	2	1	6	4	6	1	6	1	1	6	3	1	4	4	6	1	6	6	6	6	6	6	6	6	6	6	4	6
121	6	6	5	4	4	3	3	3	3	3	4	6	6	6	3	6	2	3	3	3	3	6	3	3	4	6	4	3	1	4	4	3	3	5	4	6	1	6	6	6	4	5	2	3	4	6	5	4	3
122	1	2	1	1	1	6	1	1	2	1	1	6	1	6	6	6	1	3	4	1	1	1	1	1	1	6	1	1	1	1	1	2	1	6	6	6	1	6	6	1	6	6	1	6	6	6	6	1	6
123	3	3	6	6	6	3	6	6	3	2	6	1	3	3	4	6	1	6	6	1	6	2	6	6	2	4	1	6	1	6	6	3	6	6	6	3	4	4	4	6	6	6	5	6	6	6	6	6	6
124	6	6	6	6	6	6	6	6	6	6	6	6	6	6	6	6	6	6	6	3	6	6	6	6	6	6	5	6	1	6	6	6	6	6	6	6	6	6	6	6	6	6	5	2	6	6	6	6	6
125	4	3	3	3	3	4	3	3	4	4	3	4	4	4	4	3	3	4	4	3	3	4	3	3	4	4	4	3	3	3	3	4	3	4	4	4	3	4	4	3	4	4	3	3	4	4	4	4	3
126	6	6	6	1	1	6	6	4	4	6	6	6	6	6	6	6	6	4	6	2	6	4	3	6	6	6	6	6	1	6	4	6	6	6	6	6	1	6	6	1	6	6	6	6	3	6	6	6	6
127	3	4	3	4	4	3	4	3	3	3	3	4	4	4	3	4	4	4	4	3	4	4	3	3	3	4	4	4	4	3	3	3	4	3	4	3	4	3	3	3	3	3	3	3	4	3	3	4	4
128	6	6	6	6	4	6	6	6	6	2	3	6	6	6	5	6	5	6	6	1	6	3	6	6	6	6	2	6	1	6	6	5	6	6	6	6	4	6	6	4	6	6	1	5	6	6	6	6	6
129	2	4	6	2	1	3	6	2	4	2	4	4	6	6	5	6	6	5	4	3	6	2	6	6	6	2	1	6	1	6	3	4	4	6	5	5	5	5	6	6	6	5	2	3	5	6	6	5	5
130	4	6	6	3	6	5	6	3	5	5	2	4	1	5	5	4	6	5	6	1	4	4	3	3	4	4	1	6	1	4	5	3	3	3	5	4	5	4	6	4	5	6	1	1	4	6	4	5	5
131	6	6	6	6	6	6	6	1	6	1	6	6	6	6	6	6	6	6	6	1	6	6	6	6	1	6	6	6	1	6	6	6	6	6	6	6	1	6	6	6	6	6	1	1	6	6	6	6	6
132	6	6	6	6	6	6	6	6	6	6	6	6	1	6	6	6	6	6	6	1	6	6	6	6	6	6	6	6	1	6	6	6	6	6	6	6	6	6	6	6	6	6	1	1	6	6	6	6	6
133	1	6	6	1	4	6	4	4	3	1	4	6	6	6	1	6	3	6	3	1	4	3	4	4	6	3	6	6	1	4	3	3	6	3	5	6	1	6	6	4	6	6	1	4	5	3	6	6	6
134	4	6	5	6	4	4	2	3	5	3	4	4	1	6	4	3	3	6	6	1	3	1	3	4	3	3	1	3	2	2	3	1	2	3	4	5	3	3	5	4	6	5	4	4	5	4	3	5	4
135	6	6	6	6	6	6	6	1	1	6	6	6	6	6	6	6	6	6	6	1	6	6	6	6	6	6	6	6	1	6	6	6	6	6	6	6	1	6	6	6	6	6	6	1	6	6	6	6	6
136	6	6	6	6	6	6	6	6	1	6	6	6	6	6	6	6	6	6	6	1	6	6	6	6	6	6	6	6	1	6	1	6	6	6	6	6	1	6	6	6	6	6	6	1	6	6	6	6	6
137	6	6	6	6	6	6	6	5	6	6	6	2	6	6	6	6	5	6	6	3	6	2	6	6	6	6	6	6	1	6	6	6	6	6	6	6	2	6	6	6	6	6	6	4	6	6	6	6	6
138	6	6	6	6	6	6	6	6	1	6	6	4	5	6	6	6	6	6	6	2	6	1	6	6	6	6	6	6	1	6	6	6	6	6	6	6	2	5	6	6	6	6	6	3	6	6	6	6	6
139	6	6	6	6	6	6	6	6	6	6	6	1	6	6	6	6	6	6	6	1	6	6	6	6	6	6	6	6	1	6	6	6	6	6	6	6	1	6	6	6	6	6	6	1	6	6	6	6	6
140	6	6	6	6	6	6	6	6	6	2	6	1	1	6	6	6	6	6	6	1	6	1	6	6	3	6	1	6	1	6	6	6	6	6	6	6	4	6	6	6	6	6	6	5	6	6	6	6	6
141	6	6	6	6	6	6	6	6	1	5	6	5	1	6	6	6	6	6	6	2	6	1	6	6	6	6	2	6	1	6	6	5	6	5	6	6	2	5	6	1	6	6	6	3	6	6	6	6	6
142	6	6	6	6	6	6	6	6	1	6	6	3	1	6	6	6	6	6	6	2	6	1	6	6	6	6	5	6	1	6	6	6	6	6	6	6	2	5	6	6	6	6	6	3	6	6	6	6	6
143	6	6	6	6	6	6	6	6	1	6	6	1	4	6	6	6	6	6	6	3	6	1	6	6	6	6	6	6	6	6	6	6	6	6	6	6	3	6	6	6	6	6	4	3	6	6	6	6	6
144	6	1	6	6	6	6	6	6	6	6	6	6	6	6	6	6	6	6	6	1	6	6	6	6	6	6	6	6	1	6	6	6	6	6	6	6	6	6	6	6	6	6	1	6	6	6	6	6	6
145	5	6	5	6	3	3	3	2	5	2	6	3	1	3	4	6	2	5	6	1	2	2	5	6	2	5	3	5	1	4	3	2	3	3	4	6	1	5	6	3	6	6	1	3	6	3	5	6	6
146	6	6	6	6	6	6	6	6	6	3	6	3	1	6	6	6	6	6	6	1	6	6	6	6	6	6	3	6	1	6	4	4	4	4	4	6	6	6	6	6	6	6	6	1	6	6	6	6	6
147	3	2	3	3	1	1	1	1	1	4	3	6	1	4	1	3	1	4	4	3	3	4	3	3	4	6	4	1	3	3	3	4	3	4	4	6	1	6	6	6	6	6	1	1	4	6	4	4	5
148	6	1	1	1	1	6	1	1	6	6	1	6	6	6	6	1	1	6	6	1	1	6	1	1	6	6	6	1	1	1	1	6	1	6	6	6	1	6	6	1	6	6	1	1	6	6	6	6	1
149	2	4	6	2	1	3	6	2	4	2	4	4	6	6	5	6	6	5	4	3	6	2	6	6	6	2	1	6	1	6	3	4	4	6	5	5	5	5	6	6	6	5	2	3	5	6	6	5	5
150	6	6	6	6	6	6	6	1	6	1	6	6	6	6	6	6	6	6	6	1	6	6	6	6	1	6	6	6	1	6	6	6	6	6	6	6	1	6	6	6	6	6	1	1	6	6	6	6	6
151	3	4	5	2	4	4	4	3	5	3	5	3	1	6	5	6	3	5	6	1	6	2	6	6	6	4	2	6	1	4	3	1	3	5	4	6	4	2	6	4	6	6	2	2	6	6	4	6	6
152	5	6	1	6	5	6	4	1	4	5	4	1	6	6	6	6	6	6	6	3	5	6	6	6	6	6	1	6	3	4	4	4	5	3	4	6	6	6	6	5	4	5	4	4	5	6	4	6	6
153	3	3	6	4	3	1	6	6	6	2	5	5	1	6	2	6	2	6	6	1	6	1	6	6	6	1	1	6	1	3	6	2	6	4	4	6	2	4	6	3	6	6	6	1	6	5	5	6	6
154	5	5	5	2	6	2	4	5	5	1	4	4	1	6	2	5	3	5	6	3	4	2	6	6	6	2	1	6	1	5	5	2	4	4	6	6	5	6	6	6	5	6	2	2	4	4	6	6	1
155	3	2	5	2	4	3	5	5	5	2	5	3	1	6	1	6	4	6	6	2	6	1	6	5	5	1	1	5	1	5	2	1	3	3	4	5	1	3	6	5	5	6	5	2	6	5	6	6	6
156	1	6	6	1	4	6	4	4	3	1	4	6	6	6	1	6	3	6	3	1	4	3	4	4	6	3	6	6	1	4	3	3	6	3	5	6	1	6	6	4	6	6	1	4	5	3	6	6	6
157	5	6	5	6	3	3	3	2	5	2	6	3	1	3	4	6	2	5	6	1	2	2	5	6	2	5	3	5	1	4	3	2	3	3	4	6	1	5	6	3	6	6	1	3	6	3	5	6	6
158	3	6	1	6	3	1	6	6	6	3	6	6	6	6	6	6	6	6	6	1	6	5	6	6	6	6	3	4	1	5	2	5	6	2	6	6	6	6	6	6	6	6	5	4	6	6	6	6	6
159	4	2	3	3	3	5	3	3	4	4	2	1	4	1	3	3	3	4	4	3	3	5	3	4	4	5	5	5	1	3	3	5	3	5	4	5	1	5	6	2	6	6	2	1	4	5	5	5	3
160	5	6	5	5	6	5	5	5	5	3	6	6	5	5	5	6	6	5	6	1	5	3	6	5	3	5	4	6	1	5	5	5	6	6	6	6	1	4	6	6	6	6	2	1	6	6	6	6	6
161	2	2	2	2	3	2	6	1	5	2	5	1	4	6	3	6	2	6	6	1	4	4	6	6	6	2	1	6	1	3	5	4	6	6	6	5	6	4	6	2	6	2	1	2	5	5	6	6	6
162	6	5	4	6	4	6	6	5	4	2	2	6	2	5	5	4	5	3	6	2	5	6	4	3	6	4	6	3	4	2	3	6	3	5	4	5	3	6	6	6	6	5	1	1	6	6	6	5	6
163	6	6	6	3	1	5	3	1	6	6	6	6	5	5	6	6	5	6	6	1	5	6	5	6	6	3	4	6	1	5	1	6	6	6	6	6	5	6	6	2	6	6	5	4	6	6	6	6	6
164	3	4	4	5	2	4	4	4	2	2	4	3	2	4	3	4	6	2	2	2	4	3	6	5	3	3	2	5	4	5	4	1	3	4	4	5	4	4	4	3	3	3	2	3	4	5	4	2	4
165	5	6	3	4	2	5	6	2	3	4	3	5	6	2	6	6	6	5	6	6	6	1	5	5	5	2	3	6	1	6	3	3	6	3	1	6	4	6	6	4	5	6	4	1	6	6	6	6	6
166	6	6	6	6	2	5	3	6	1	3	2	2	3	6	1	6	1	1	6	5	4	1	6	6	6	1	1	2	1	5	5	4	6	6	2	6	1	6	6	4	6	6	6	6	6	6	6	6	6
167	6	6	5	2	1	3	2	2	1	6	6	6	1	6	6	6	4	3	6	1	3	1	2	4	6	6	1	6	1	5	3	6	6	6	6	1	1	6	6	4	6	6	6	1	6	6	6	1	6
168	6	5	6	6	4	6	3	3	5	3	5	4	3	6	6	5	2	5	6	1	3	1	5	4	3	5	2	4	1	3	2	2	3	3	4	6	3	4	6	5	6	6	2	1	6	4	4	6	4
169	4	6	5	6	4	4	2	3	5	3	4	4	1	6	4	3	3	6	6	1	3	1	3	4	3	3	1	3	2	2	3	1	2	3	4	5	3	3	5	4	6	5	4	4	5	4	3	5	4
170	5	6	6	6	5	5	5	4	5	4	4	6	1	6	6	4	2	6	6	1	5	1	3	5	5	4	1	3	1	1	2	2	1	3	5	6	3	5	6	3	6	6	2	1	5	4	5	6	6
171	6	6	6	6	4	6	6	3	4	4	6	6	4	6	4	3	3	6	6	1	3	2	6	6	4	5	3	5	1	5	3	3	4	3	4	6	1	5	6	5	6	6	2	1	6	5	2	6	4
172	2	1	6	3	5	1	6	6	6	3	4	6	2	5	3	6	6	6	6	1	2	2	6	6	6	5	5	6	3	6	5	4	6	5	6	6	6	5	6	2	6	6	3	2	6	6	6	6	6
173	4	6	6	3	6	5	6	3	5	5	2	4	1	5	5	4	6	5	6	1	4	4	3	3	4	4	1	6	1	4	5	3	3	3	5	4	5	4	6	4	5	6	1	1	4	6	4	5	5
174	6	6	6	6	6	6	6	6	6	6	6	6	1	6	6	6	6	6	6	1	6	6	6	6	6	6	6	6	1	6	6	6	6	6	6	6	6	6	6	6	6	6	1	1	6	6	6	6	6
175	6	6	6	6	6	6	6	6	6	3	6	3	1	6	6	6	6	6	6	1	6	6	6	6	6	6	3	6	1	6	4	4	4	4	4	6	6	6	6	6	6	6	6	1	6	6	6	6	6
176	6	1	6	5	6	2	5	5	3	3	5	6	1	6	3	5	5	4	3	2	5	3	3	5	3	4	2	6	4	5	4	3	4	3	3	5	4	4	6	5	3	3	4	6	3	5	4	3	5
177	6	6	6	6	6	6	6	6	6	6	6	6	1	6	6	6	6	6	6	1	6	6	6	6	6	6	6	6	1	6	6	6	6	6	6	6	6	6	6	6	6	6	6	1	6	6	6	6	6
178	6	6	6	6	6	6	6	6	2	5	5	6	1	6	6	6	6	6	6	1	5	6	6	6	6	6	5	6	1	5	6	6	6	6	6	6	6	6	6	6	6	6	6	1	6	6	6	6	6
179	4	5	6	4	4	3	5	5	2	2	5	2	1	6	3	5	5	2	2	5	5	3	5	5	2	3	2	6	5	5	5	2	5	2	2	2	5	2	6	4	2	2	5	5	2	2	2	2	5
180	4	5	4	2	4	4	3	6	5	3	3	4	1	6	5	6	4	4	6	1	3	4	6	5	6	6	2	4	1	4	6	6	5	6	6	6	2	6	6	6	6	6	1	1	6	6	6	6	6
181	1	6	6	2	4	4	6	6	5	3	3	4	1	4	6	3	3	4	6	1	3	3	3	6	5	6	2	5	1	4	6	6	3	6	6	4	1	6	4	4	4	4	1	1	6	6	6	5	3
182	6	6	6	6	6	6	6	6	6	6	6	6	1	6	6	6	6	6	6	1	1	6	6	6	6	6	6	6	1	6	6	6	6	6	6	6	3	6	6	6	6	6	1	1	6	6	6	6	6
183	3	6	3	3	5	5	3	6	4	3	2	4	1	6	5	3	3	5	6	1	3	4	6	6	6	4	3	5	1	4	6	6	6	6	6	6	2	6	6	6	6	6	1	1	6	6	6	6	3
184	6	6	6	6	6	6	6	1	1	6	6	6	6	6	6	6	6	6	6	1	6	6	6	6	6	6	6	6	1	6	6	6	6	6	6	6	1	6	6	6	6	6	6	1	6	6	6	6	6
185	6	6	6	6	6	6	6	6	1	6	6	6	6	6	6	6	6	6	6	1	6	6	6	6	6	6	6	6	1	6	1	6	6	6	6	6	1	6	6	6	6	6	6	1	6	6	6	6	6
186	6	6	6	6	6	6	6	5	6	6	6	2	6	6	6	6	5	6	6	3	6	2	6	6	6	6	6	6	1	6	6	6	6	6	6	6	2	6	6	6	6	6	6	4	6	6	6	6	6
187	6	6	6	6	6	6	6	6	1	6	6	4	5	6	6	6	6	6	6	2	6	1	6	6	6	6	6	6	1	6	6	6	6	6	6	6	2	5	6	6	6	6	6	3	6	6	6	6	6
188	6	6	6	6	6	6	6	6	6	6	6	1	6	6	6	6	6	6	6	1	6	6	6	6	6	6	6	6	1	6	6	6	6	6	6	6	1	6	6	6	6	6	6	1	6	6	6	6	6
189	6	6	6	6	6	6	6	6	6	2	6	1	1	6	6	6	6	6	6	1	6	1	6	6	3	6	1	6	1	6	6	6	6	6	6	6	4	6	6	6	6	6	6	5	6	6	6	6	6
190	6	6	6	6	6	6	6	6	1	5	6	5	1	6	6	6	6	6	6	2	6	1	6	6	6	6	2	6	1	6	6	5	6	5	6	6	2	5	6	1	6	6	6	3	6	6	6	6	6
191	6	6	6	6	6	6	6	6	6	6	6	6	6	6	6	6	6	6	6	1	6	6	6	6	6	6	3	6	4	6	6	6	6	6	6	6	6	6	6	6	6	1	6	4	6	6	6	6	6
192	6	6	6	6	6	6	6	6	1	6	6	1	4	6	6	6	6	6	6	3	6	1	6	6	6	6	6	6	6	6	6	6	6	6	6	6	3	6	6	6	6	6	4	3	6	6	6	6	6
193	6	1	6	6	6	6	6	6	6	6	6	6	6	6	6	6	6	6	6	1	6	6	6	6	6	6	6	6	1	6	6	6	6	6	6	6	6	6	6	6	6	6	1	6	6	6	6	6	6
194	3	2	3	3	1	1	1	1	1	4	3	6	1	4	1	3	1	4	4	3	3	4	3	3	4	6	4	1	3	3	3	4	3	4	4	6	1	6	6	6	6	6	1	1	4	6	4	4	5
195	6	1	1	1	1	6	1	1	6	6	1	6	6	6	6	1	1	6	6	1	1	6	1	1	6	6	6	1	1	1	1	6	1	6	6	6	1	6	6	1	6	6	1	1	6	6	6	6	1
196	5	5	2	3	3	4	3	3	4	4	5	5	5	4	4	3	3	4	4	2	5	5	5	5	4	4	4	3	3	3	3	4	3	5	5	5	2	4	4	6	4	4	3	3	4	4	5	5	2
197	6	6	6	6	6	6	6	6	1	6	6	3	1	6	6	6	6	6	6	2	6	1	6	6	6	6	5	6	1	6	6	6	6	6	6	6	2	5	6	6	6	6	6	3	6	6	6	6	6
198	3	5	6	6	1	6	6	5	2	6	1	3	6	1	6	6	1	1	2	1	1	3	4	4	3	6	6	6	1	5	6	1	4	3	6	6	6	6	6	6	2	6	1	1	2	5	6	6	5
199	3	4	4	4	4	3	4	4	3	3	4	3	3	3	3	4	4	3	3	4	4	3	4	4	3	3	3	4	4	4	4	3	4	3	3	3	4	3	3	4	3	3	4	4	3	3	3	3	4
200	5	4	3	4	5	5	4	3	4	4	4	3	3	6	2	3	5	4	2	4	5	3	4	4	4	6	3	4	4	5	6	3	4	3	5	4	3	5	6	6	6	3	3	3	4	2	3	3	4
201	6	1	1	1	1	6	1	1	6	6	1	6	6	6	6	1	1	6	6	1	1	6	1	1	6	6	6	1	1	1	1	6	1	6	6	6	1	6	6	1	6	6	1	1	6	6	6	6	1
202	6	6	6	6	6	6	6	6	6	6	6	6	1	6	6	6	6	6	6	2	6	1	6	6	6	6	6	6	1	6	6	6	6	6	6	6	2	6	6	1	6	6	6	3	6	6	6	6	6
203	6	6	5	6	6	6	6	6	4	6	6	6	6	6	6	6	6	4	6	6	6	4	6	6	6	6	6	6	1	6	6	6	6	6	6	4	2	6	6	1	6	6	1	6	4	3	6	6	6
204	6	1	6	6	6	5	6	6	6	6	6	6	6	6	5	6	6	6	5	1	6	3	6	6	6	6	5	6	1	6	6	6	6	6	6	6	6	6	6	6	6	6	6	5	6	6	6	6	6
205	6	5	6	6	6	6	6	4	6	4	6	6	6	6	6	6	6	6	6	4	6	3	6	6	6	6	6	6	1	6	6	6	6	3	6	6	6	6	6	6	6	6	3	4	6	5	6	6	1
206	6	6	6	6	6	6	6	1	6	6	6	6	6	6	6	6	6	6	6	1	6	6	6	6	6	6	1	6	1	6	6	6	6	6	6	6	1	6	6	6	6	6	6	1	6	6	6	6	6
207	6	6	6	1	6	6	6	6	6	6	6	6	6	6	6	6	6	6	6	1	6	6	6	6	6	6	6	6	1	6	6	6	6	6	6	6	6	6	6	6	6	6	6	3	6	6	6	6	6
208	6	6	6	6	6	6	6	6	6	6	6	6	6	6	6	6	6	6	6	1	6	6	6	6	6	6	6	6	1	6	6	6	6	6	6	6	1	6	6	6	6	6	6	1	6	6	6	6	1
209	4	6	6	6	6	6	6	2	6	6	6	6	6	6	6	6	6	6	6	1	6	6	6	6	6	6	6	6	1	6	6	6	6	6	6	5	5	6	6	6	6	6	6	6	4	6	6	6	6
210	6	6	6	6	6	6	6	4	3	3	4	6	6	6	6	6	6	3	3	4	4	3	4	4	3	6	3	6	4	4	4	3	4	3	3	6	6	6	6	6	6	6	6	4	3	3	3	3	4
211	5	5	5	5	6	5	5	4	4	5	5	5	2	5	5	5	5	4	5	3	6	5	5	5	5	5	4	5	2	5	5	4	4	5	3	5	5	4	5	5	5	5	5	4	4	4	4	4	5
212	4	1	2	2	2	6	3	1	5	4	3	5	5	5	5	3	1	5	5	2	2	4	2	3	4	5	4	3	2	3	3	4	3	5	5	5	2	5	5	2	5	4	3	2	5	3	5	4	2
213	6	1	1	1	1	6	1	1	6	6	1	6	6	6	6	1	1	6	6	1	1	6	1	1	6	6	6	1	1	1	1	6	1	6	6	6	1	6	6	1	6	6	1	1	6	6	6	6	1
214	6	6	6	6	6	1	6	5	6	6	6	6	6	6	6	6	6	6	6	1	6	6	6	6	5	6	5	6	1	6	6	6	6	6	6	6	6	6	6	6	6	6	6	1	6	6	6	5	6
215	6	1	6	6	6	6	6	6	6	6	6	6	6	6	6	6	6	6	6	1	6	6	6	6	6	6	4	6	6	6	6	6	6	6	6	6	6	6	6	6	6	6	6	1	6	6	6	6	6
216	6	2	6	6	6	6	6	5	6	6	6	5	6	6	6	6	6	6	6	1	6	2	6	6	5	6	5	6	1	6	6	6	6	6	5	4	5	6	6	6	5	5	6	6	5	6	6	5	6
217	3	6	6	6	6	5	6	4	6	4	5	6	3	6	6	6	6	5	6	1	5	5	5	2	5	6	6	6	1	6	3	4	6	6	5	6	6	6	6	6	5	6	6	1	6	6	5	5	2
218	6	6	6	6	6	6	6	6	6	6	6	6	6	6	6	6	6	6	6	1	6	6	6	6	6	6	6	6	1	6	6	6	6	6	6	6	6	6	6	6	6	6	6	1	6	6	6	6	6
219	5	6	6	6	6	4	6	6	3	5	6	4	4	5	5	6	6	4	4	2	6	5	6	6	4	5	4	6	2	6	6	4	6	5	4	5	6	5	5	6	4	5	6	3	5	5	5	4	6
220	3	4	5	3	2	4	2	5	2	4	3	1	2	2	2	5	2	2	4	5	3	2	5	5	4	2	5	5	2	5	5	5	3	4	2	4	3	5	4	5	4	4	5	5	4	2	4	2	3
221	6	1	6	6	6	6	6	6	6	6	1	6	6	6	6	6	6	6	6	1	6	4	6	6	6	6	6	6	1	6	6	6	6	6	6	6	6	6	6	6	6	6	6	1	6	6	6	6	6
222	5	3	4	3	4	4	4	3	2	2	3	4	4	2	4	4	3	4	5	2	4	4	4	4	3	4	5	5	4	5	5	4	3	5	4	2	3	3	4	4	4	4	4	3	4	4	4	4	4
223	6	6	6	6	6	6	6	6	6	6	6	6	1	6	6	6	6	6	6	1	6	6	6	6	6	6	6	6	1	6	6	6	6	6	6	6	6	6	6	6	6	6	6	1	1	6	6	6	6
224	6	4	4	4	4	3	4	3	3	3	4	5	3	5	3	4	5	3	3	4	4	3	4	5	3	5	2	5	4	4	4	3	4	3	3	2	2	3	5	2	5	2	5	4	3	3	3	2	5
225	6	6	6	6	6	6	6	6	6	6	6	6	6	6	6	6	6	6	6	1	6	6	6	6	6	6	6	6	1	6	6	6	6	6	6	6	1	6	6	6	6	6	6	1	6	6	6	6	1
226	6	1	5	1	5	6	5	6	5	5	6	6	6	6	6	6	6	5	6	2	5	4	5	5	4	6	2	6	1	6	5	5	5	3	5	6	6	6	6	6	6	6	6	5	5	5	5	5	5
227	6	6	6	1	6	5	6	4	6	3	6	2	1	3	4	6	4	5	4	4	4	3	4	4	3	6	1	6	1	6	6	5	4	3	3	2	6	6	5	6	6	5	2	1	6	3	3	3	4
228	5	4	3	3	3	4	3	3	2	4	3	3	4	3	4	4	5	3	4	3	3	3	4	5	4	4	3	3	3	4	3	2	4	5	3	4	3	3	4	3	3	3	3	5	4	4	4	4	3
229	6	6	6	6	6	6	6	5	5	6	6	4	4	6	5	6	6	5	5	4	6	4	6	6	4	6	5	6	1	6	6	6	6	6	6	4	5	4	6	6	5	6	5	6	5	5	4	5	6
230	3	4	4	5	6	3	4	2	3	3	4	3	4	3	3	5	4	3	3	5	5	1	5	5	2	3	4	4	4	4	4	3	4	3	3	4	4	3	3	5	3	3	4	1	4	4	2	2	6
231	6	1	6	6	6	6	6	4	3	3	4	6	1	6	6	6	4	3	3	4	4	3	4	4	3	6	1	4	4	4	4	3	4	3	3	6	6	5	6	6	3	3	4	4	3	3	3	3	4
232	6	3	1	3	1	3	1	1	6	4	4	3	3	3	6	1	1	6	4	4	2	6	4	1	4	6	3	1	2	3	1	3	3	4	6	6	3	6	4	3	6	3	4	3	4	6	4	3	2
233	6	2	2	2	3	6	3	2	5	5	2	4	3	5	4	2	2	5	4	2	4	4	2	2	4	6	4	1	2	3	2	4	3	4	5	4	2	4	3	1	4	4	2	3	5	5	5	5	2
234	4	6	6	6	6	6	1	6	1	1	3	6	6	6	6	6	1	4	4	3	3	4	3	3	4	1	1	1	1	1	3	4	3	4	5	6	6	1	6	1	6	1	6	6	6	4	4	4	3
235	6	6	6	6	6	6	6	6	5	5	6	6	6	6	6	6	6	6	5	1	6	4	6	6	5	6	3	6	2	6	6	6	6	6	5	6	6	6	6	6	6	5	6	1	4	5	5	4	6
236	5	6	6	6	6	6	6	5	1	4	6	4	5	6	6	6	6	5	5	2	6	3	6	6	5	6	6	6	1	6	5	5	6	6	6	5	6	6	6	6	6	4	6	1	5	5	6	5	6
237	5	6	6	6	6	5	6	5	6	4	6	5	5	6	6	6	6	5	1	3	6	3	6	6	4	6	4	6	1	6	6	6	4	6	6	5	5	6	6	6	5	5	6	1	5	4	6	5	6
238	3	3	5	5	4	2	3	4	3	3	4	3	4	3	2	4	3	3	3	4	4	3	5	4	3	3	3	4	3	4	4	3	4	4	3	5	5	3	4	4	3	4	3	3	3	3	4	3	5
239	5	2	4	4	5	5	5	4	4	4	4	5	6	6	5	3	4	5	5	3	5	6	6	5	6	6	3	6	2	4	5	5	5	5	6	5	1	6	6	6	5	6	6	4	5	5	6	6	6
240	6	6	6	6	6	6	6	6	3	4	4	6	6	6	6	6	2	5	3	1	6	2	6	6	6	6	6	6	1	6	6	6	6	6	6	6	5	6	6	6	3	6	4	1	6	6	4	6	5
241	5	5	5	4	4	4	4	4	4	4	4	3	3	5	4	3	3	4	5	3	5	5	4	5	4	5	3	5	2	3	3	2	5	5	4	4	4	5	5	4	4	4	3	4	3	2	5	4	5
242	3	4	4	4	4	3	4	3	4	4	3	3	3	3	3	4	4	4	4	3	3	4	3	3	4	3	3	4	3	3	3	4	3	4	4	3	4	3	3	4	3	4	3	3	4	4	4	4	3
243	4	3	3	3	3	4	3	4	3	3	4	4	4	4	4	3	3	3	3	3	4	3	3	3	4	4	4	3	4	4	4	3	4	4	4	4	3	3	4	3	4	3	4	4	3	3	4	4	3
244	6	6	6	6	6	6	6	6	6	6	6	6	6	6	6	6	6	6	6	1	6	6	6	6	6	6	6	6	1	6	6	6	6	6	6	6	1	6	6	6	6	6	6	1	6	6	6	6	1
245	5	6	4	4	3	4	5	4	4	4	3	3	4	4	4	5	3	3	4	1	5	3	3	4	2	4	1	4	5	5	4	4	4	5	4	3	3	3	5	4	3	5	3	5	2	4	4	3	5
246	6	6	6	6	6	6	6	6	6	6	6	6	6	6	6	6	6	6	6	1	6	6	6	6	6	6	6	6	1	6	6	6	6	6	6	6	1	6	6	6	6	6	6	1	6	6	6	6	1
247	6	1	1	6	6	6	6	5	6	6	6	6	6	6	6	6	6	6	6	1	6	6	6	6	6	6	6	6	1	6	6	6	6	6	6	6	1	6	6	6	6	6	6	1	6	6	6	6	6
248	6	6	6	6	5	6	6	5	3	6	1	5	5	6	5	6	6	5	5	1	6	4	6	6	3	6	4	6	1	6	5	4	6	6	6	6	6	6	6	6	4	6	6	1	6	5	6	5	5
249	6	1	1	1	1	6	1	1	6	6	1	6	6	6	6	1	1	6	6	1	2	6	1	1	6	6	6	1	1	1	1	6	1	6	6	6	1	6	6	1	6	6	1	1	6	6	6	6	1
250	6	6	6	6	6	6	5	3	6	6	5	6	6	6	6	5	6	6	2	1	5	6	5	5	5	6	6	6	1	5	5	6	5	6	6	6	6	6	6	6	6	6	5	3	6	6	6	5	5
251	6	6	6	6	6	6	6	6	6	6	6	6	6	6	6	6	6	6	6	1	6	6	6	6	6	6	6	6	1	6	6	6	6	6	6	6	6	6	6	6	6	6	6	1	6	6	6	6	1
252	4	4	4	3	4	3	3	3	4	4	3	3	4	3	3	3	3	4	4	3	3	4	3	3	4	3	4	3	3	3	3	4	3	4	4	3	4	3	3	4	4	4	3	3	4	4	4	4	3
253	6	5	6	5	6	2	4	5	4	4	4	6	6	6	6	6	3	6	6	1	6	6	4	5	5	6	1	3	3	3	3	4	1	4	6	6	6	6	6	6	6	6	1	6	6	5	4	6	6
254	6	6	6	6	6	6	6	3	5	5	6	6	6	6	6	6	6	6	5	4	6	6	5	6	6	6	5	6	1	6	6	6	6	6	6	6	4	6	6	6	6	6	3	2	6	6	6	6	6
255	3	4	5	4	5	3	5	5	3	2	5	4	2	2	2	5	5	2	3	3	5	3	4	4	3	2	2	4	5	5	5	3	4	2	3	4	2	3	3	4	2	3	5	4	3	3	4	4	5
256	4	3	3	3	3	4	3	3	4	3	4	4	4	4	4	3	3	3	3	3	3	3	3	3	4	4	4	3	3	4	4	3	3	4	4	4	3	4	4	3	4	4	3	3	4	4	3	4	4
257	6	1	1	1	1	6	1	1	6	6	1	6	6	6	6	1	1	6	6	1	1	6	1	1	6	6	6	1	1	1	1	6	1	6	6	6	1	6	6	1	6	6	1	1	6	6	6	6	1
258	6	6	6	6	4	6	6	5	5	6	5	6	6	6	5	6	6	6	6	1	6	6	5	5	6	6	3	1	1	5	5	6	5	6	6	6	6	6	6	6	6	6	5	1	6	6	6	6	5
259	3	3	4	4	4	3	4	4	3	3	5	4	3	3	4	4	4	3	3	4	4	2	4	4	3	3	3	4	5	5	5	3	4	3	3	3	3	4	4	4	2	2	3	4	3	3	3	3	4
260	6	1	1	1	1	6	1	1	6	6	1	6	6	6	6	1	1	6	6	1	1	6	1	1	5	6	6	1	1	1	2	6	1	6	5	6	1	6	6	1	6	6	1	1	6	6	6	5	2
261	3	4	2	3	4	2	4	4	4	5	2	1	1	3	4	5	4	3	3	3	3	1	3	4	3	3	3	4	4	2	2	1	2	1	1	2	4	1	3	4	3	2	5	4	3	1	4	1	6
262	4	3	3	3	3	4	3	3	4	4	3	4	4	4	4	3	3	4	4	4	3	4	3	3	3	4	4	3	3	3	3	4	3	3	4	4	3	4	4	3	4	4	3	3	4	4	4	4	3
263	5	5	5	5	5	5	6	2	5	5	5	5	5	5	5	5	6	5	5	5	6	4	5	6	5	5	3	6	2	5	4	4	4	4	5	6	5	5	6	5	6	6	5	3	6	5	5	5	5
264	5	6	5	5	5	1	6	1	1	6	6	6	6	6	6	6	1	6	6	1	6	1	6	6	6	6	6	6	1	6	6	6	6	6	6	6	5	6	6	5	6	6	6	1	6	6	6	6	6
265	6	6	6	6	6	6	6	6	1	6	6	6	6	6	6	6	6	6	6	6	6	1	6	6	6	6	6	6	1	6	6	6	6	6	6	6	6	6	6	6	6	6	6	1	6	6	6	6	6
266	4	3	3	3	3	4	3	3	4	4	3	4	4	4	4	3	3	4	4	3	3	4	3	3	4	4	4	3	3	3	3	4	3	4	4	4	3	4	4	3	4	4	3	3	4	4	4	4	3
267	6	4	4	5	5	4	6	5	4	4	5	6	6	6	5	5	5	4	4	5	5	4	5	5	4	4	3	5	3	4	3	4	6	2	2	6	5	6	4	5	4	4	5	4	4	4	3	2	5
268	6	3	4	6	6	6	1	1	6	6	1	6	6	6	6	6	6	6	6	4	5	2	1	6	4	6	1	6	1	1	6	3	1	4	4	6	1	6	6	6	6	6	6	6	6	6	6	4	6
269	6	6	5	4	4	3	3	3	3	3	4	6	6	6	3	6	2	3	3	3	3	6	3	3	4	6	4	3	1	4	4	3	3	5	4	6	1	6	6	6	4	5	2	3	4	6	5	4	3
270	1	2	1	1	1	6	1	1	2	1	1	6	1	6	6	6	1	3	4	1	1	1	1	1	1	6	1	1	1	1	1	2	1	6	6	6	1	6	6	1	6	6	1	6	6	6	6	1	6
271	3	3	6	6	6	3	6	6	3	2	6	1	3	3	4	6	1	6	6	1	6	2	6	6	2	4	1	6	1	6	6	3	6	6	6	3	4	4	4	6	6	6	5	6	6	6	6	6	6
272	6	6	6	6	6	6	6	6	6	6	6	6	6	6	6	6	6	6	6	3	6	6	6	6	6	6	5	6	1	6	6	6	6	6	6	6	6	6	6	6	6	6	5	2	6	6	6	6	6
273	4	3	3	3	3	4	3	3	4	4	3	4	4	4	4	3	3	4	4	3	3	4	3	3	4	4	4	3	3	3	3	4	3	4	4	4	3	4	4	3	4	4	3	3	4	4	4	4	3
274	6	6	6	1	1	6	6	4	4	6	6	6	6	6	6	6	6	4	6	2	6	4	3	6	6	6	6	6	1	6	4	6	6	6	6	6	1	6	6	1	6	6	6	6	3	6	6	6	6
275	3	4	3	4	4	3	4	3	3	3	3	4	4	4	3	4	4	4	4	3	4	4	3	3	3	4	4	4	4	3	3	3	4	3	4	3	4	3	3	3	3	3	3	3	4	3	3	4	4
276	6	6	6	6	4	6	6	6	6	2	3	6	6	6	5	6	5	6	6	1	6	3	6	6	6	6	2	6	1	6	6	5	6	6	6	6	4	6	6	4	6	6	1	5	6	6	6	6	6
277	2	4	6	2	1	3	6	2	4	2	4	4	6	6	5	6	6	5	4	3	6	2	6	6	6	2	1	6	1	6	3	4	4	6	5	5	5	5	6	6	6	5	2	3	5	6	6	5	5
278	4	6	6	3	6	5	6	3	5	5	2	4	1	5	5	4	6	5	6	1	4	4	3	3	4	4	1	6	1	4	5	3	3	3	5	4	5	4	6	4	5	6	1	1	4	6	4	5	5
279	6	6	6	6	6	6	6	1	6	1	6	6	6	6	6	6	6	6	6	1	6	6	6	6	1	6	6	6	1	6	6	6	6	6	6	6	1	6	6	6	6	6	1	1	6	6	6	6	6
280	6	6	6	6	6	6	6	6	6	6	6	6	1	6	6	6	6	6	6	1	6	6	6	6	6	6	6	6	1	6	6	6	6	6	6	6	6	6	6	6	6	6	1	1	6	6	6	6	6
281	1	6	6	1	4	6	4	4	3	1	4	6	6	6	1	6	3	6	3	1	4	3	4	4	6	3	6	6	1	4	3	3	6	3	5	6	1	6	6	4	6	6	1	4	5	3	6	6	6
282	4	6	5	6	4	4	2	3	5	3	4	4	1	6	4	3	3	6	6	1	3	1	3	4	3	3	1	3	2	2	3	1	2	3	4	5	3	3	5	4	6	5	4	4	5	4	3	5	4
283	6	6	6	6	6	6	6	1	1	6	6	6	6	6	6	6	6	6	6	1	6	6	6	6	6	6	6	6	1	6	6	6	6	6	6	6	1	6	6	6	6	6	6	1	6	6	6	6	6
284	6	6	6	6	6	6	6	6	1	6	6	6	6	6	6	6	6	6	6	1	6	6	6	6	6	6	6	6	1	6	1	6	6	6	6	6	1	6	6	6	6	6	6	1	6	6	6	6	6
285	6	6	6	6	6	6	6	5	6	6	6	2	6	6	6	6	5	6	6	3	6	2	6	6	6	6	6	6	1	6	6	6	6	6	6	6	2	6	6	6	6	6	6	4	6	6	6	6	6
286	6	6	6	6	6	6	6	6	1	6	6	4	5	6	6	6	6	6	6	2	6	1	6	6	6	6	6	6	1	6	6	6	6	6	6	6	2	5	6	6	6	6	6	3	6	6	6	6	6
287	6	6	6	6	6	6	6	6	6	6	6	1	6	6	6	6	6	6	6	1	6	6	6	6	6	6	6	6	1	6	6	6	6	6	6	6	1	6	6	6	6	6	6	1	6	6	6	6	6
288	6	6	6	6	6	6	6	6	6	2	6	1	1	6	6	6	6	6	6	1	6	1	6	6	3	6	1	6	1	6	6	6	6	6	6	6	4	6	6	6	6	6	6	5	6	6	6	6	6
289	6	6	6	6	6	6	6	6	1	5	6	5	1	6	6	6	6	6	6	2	6	1	6	6	6	6	2	6	1	6	6	5	6	5	6	6	2	5	6	1	6	6	6	3	6	6	6	6	6
290	6	6	6	6	6	6	6	6	1	6	6	3	1	6	6	6	6	6	6	2	6	1	6	6	6	6	5	6	1	6	6	6	6	6	6	6	2	5	6	6	6	6	6	3	6	6	6	6	6
291	6	6	6	6	6	6	6	6	1	6	6	1	4	6	6	6	6	6	6	3	6	1	6	6	6	6	6	6	6	6	6	6	6	6	6	6	3	6	6	6	6	6	4	3	6	6	6	6	6
292	6	1	6	6	6	6	6	6	6	6	6	6	6	6	6	6	6	6	6	1	6	6	6	6	6	6	6	6	1	6	6	6	6	6	6	6	6	6	6	6	6	6	1	6	6	6	6	6	6
293	5	6	5	6	3	3	3	2	5	2	6	3	1	3	4	6	2	5	6	1	2	2	5	6	2	5	3	5	1	4	3	2	3	3	4	6	1	5	6	3	6	6	1	3	6	3	5	6	6
294	6	6	6	6	6	6	6	6	6	3	6	3	1	6	6	6	6	6	6	1	6	6	6	6	6	6	3	6	1	6	4	4	4	4	4	6	6	6	6	6	6	6	6	1	6	6	6	6	6
295	3	2	3	3	1	1	1	1	1	4	3	6	1	4	1	3	1	4	4	3	3	4	3	3	4	6	4	1	3	3	3	4	3	4	4	6	1	6	6	6	6	6	1	1	4	6	4	4	5
296	6	1	1	1	1	6	1	1	6	6	1	6	6	6	6	1	1	6	6	1	1	6	1	1	6	6	6	1	1	1	1	6	1	6	6	6	1	6	6	1	6	6	1	1	6	6	6	6	1
297	2	4	6	2	1	3	6	2	4	2	4	4	6	6	5	6	6	5	4	3	6	2	6	6	6	2	1	6	1	6	3	4	4	6	5	5	5	5	6	6	6	5	2	3	5	6	6	5	5
298	6	6	6	6	6	6	6	1	6	1	6	6	6	6	6	6	6	6	6	1	6	6	6	6	1	6	6	6	1	6	6	6	6	6	6	6	1	6	6	6	6	6	1	1	6	6	6	6	6
299	3	4	5	2	4	4	4	3	5	3	5	3	1	6	5	6	3	5	6	1	6	2	6	6	6	4	2	6	1	4	3	1	3	5	4	6	4	2	6	4	6	6	2	2	6	6	4	6	6
300	5	6	1	6	5	6	4	1	4	5	4	1	6	6	6	6	6	6	6	3	5	6	6	6	6	6	1	6	3	4	4	4	5	3	4	6	6	6	6	5	4	5	4	4	5	6	4	6	6
301	3	3	6	4	3	1	6	6	6	2	5	5	1	6	2	6	2	6	6	1	6	1	6	6	6	1	1	6	1	3	6	2	6	4	4	6	2	4	6	3	6	6	6	1	6	5	5	6	6
302	5	5	5	2	6	2	4	5	5	1	4	4	1	6	2	5	3	5	6	3	4	2	6	6	6	2	1	6	1	5	5	2	4	4	6	6	5	6	6	6	5	6	2	2	4	4	6	6	1
303	3	2	5	2	4	3	5	5	5	2	5	3	1	6	1	6	4	6	6	2	6	1	6	5	5	1	1	5	1	5	2	1	3	3	4	5	1	3	6	5	5	6	5	2	6	5	6	6	6
304	1	6	6	1	4	6	4	4	3	1	4	6	6	6	1	6	3	6	3	1	4	3	4	4	6	3	6	6	1	4	3	3	6	3	5	6	1	6	6	4	6	6	1	4	5	3	6	6	6
305	5	6	5	6	3	3	3	2	5	2	6	3	1	3	4	6	2	5	6	1	2	2	5	6	2	5	3	5	1	4	3	2	3	3	4	6	1	5	6	3	6	6	1	3	6	3	5	6	6
306	3	6	1	6	3	1	6	6	6	3	6	6	6	6	6	6	6	6	6	1	6	5	6	6	6	6	3	4	1	5	2	5	6	2	6	6	6	6	6	6	6	6	5	4	6	6	6	6	6
307	4	2	3	3	3	5	3	3	4	4	2	1	4	1	3	3	3	4	4	3	3	5	3	4	4	5	5	5	1	3	3	5	3	5	4	5	1	5	6	2	6	6	2	1	4	5	5	5	3
308	5	6	5	5	6	5	5	5	5	3	6	6	5	5	5	6	6	5	6	1	5	3	6	5	3	5	4	6	1	5	5	5	6	6	6	6	1	4	6	6	6	6	2	1	6	6	6	6	6
309	2	2	2	2	3	2	6	1	5	2	5	1	4	6	3	6	2	6	6	1	4	4	6	6	6	2	1	6	1	3	5	4	6	6	6	5	6	4	6	2	6	2	1	2	5	5	6	6	6
310	6	5	4	6	4	6	6	5	4	2	2	6	2	5	5	4	5	3	6	2	5	6	4	3	6	4	6	3	4	2	3	6	3	5	4	5	3	6	6	6	6	5	1	1	6	6	6	5	6
311	6	6	6	3	1	5	3	1	6	6	6	6	5	5	6	6	5	6	6	1	5	6	5	6	6	3	4	6	1	5	1	6	6	6	6	6	5	6	6	2	6	6	5	4	6	6	6	6	6
312	3	4	4	5	2	4	4	4	2	2	4	3	2	4	3	4	6	2	2	2	4	3	6	5	3	3	2	5	4	5	4	1	3	4	4	5	4	4	4	3	3	3	2	3	4	5	4	2	4
313	5	6	3	4	2	5	6	2	3	4	3	5	6	2	6	6	6	5	6	6	6	1	5	5	5	2	3	6	1	6	3	3	6	3	1	6	4	6	6	4	5	6	4	1	6	6	6	6	6
314	6	6	6	6	2	5	3	6	1	3	2	2	3	6	1	6	1	1	6	5	4	1	6	6	6	1	1	2	1	5	5	4	6	6	2	6	1	6	6	4	6	6	6	6	6	6	6	6	6
315	6	6	5	2	1	3	2	2	1	6	6	6	1	6	6	6	4	3	6	1	3	1	2	4	6	6	1	6	1	5	3	6	6	6	6	1	1	6	6	4	6	6	6	1	6	6	6	1	6
316	6	5	6	6	4	6	3	3	5	3	5	4	3	6	6	5	2	5	6	1	3	1	5	4	3	5	2	4	1	3	2	2	3	3	4	6	3	4	6	5	6	6	2	1	6	4	4	6	4
317	4	6	5	6	4	4	2	3	5	3	4	4	1	6	4	3	3	6	6	1	3	1	3	4	3	3	1	3	2	2	3	1	2	3	4	5	3	3	5	4	6	5	4	4	5	4	3	5	4
318	5	6	6	6	5	5	5	4	5	4	4	6	1	6	6	4	2	6	6	1	5	1	3	5	5	4	1	3	1	1	2	2	1	3	5	6	3	5	6	3	6	6	2	1	5	4	5	6	6
319	6	6	6	6	4	6	6	3	4	4	6	6	4	6	4	3	3	6	6	1	3	2	6	6	4	5	3	5	1	5	3	3	4	3	4	6	1	5	6	5	6	6	2	1	6	5	2	6	4
320	2	1	6	3	5	1	6	6	6	3	4	6	2	5	3	6	6	6	6	1	2	2	6	6	6	5	5	6	3	6	5	4	6	5	6	6	6	5	6	2	6	6	3	2	6	6	6	6	6
321	4	6	6	3	6	5	6	3	5	5	2	4	1	5	5	4	6	5	6	1	4	4	3	3	4	4	1	6	1	4	5	3	3	3	5	4	5	4	6	4	5	6	1	1	4	6	4	5	5
322	6	6	6	6	6	6	6	6	6	6	6	6	1	6	6	6	6	6	6	1	6	6	6	6	6	6	6	6	1	6	6	6	6	6	6	6	6	6	6	6	6	6	1	1	6	6	6	6	6
323	6	6	6	6	6	6	6	6	6	3	6	3	1	6	6	6	6	6	6	1	6	6	6	6	6	6	3	6	1	6	4	4	4	4	4	6	6	6	6	6	6	6	6	1	6	6	6	6	6
324	6	1	6	5	6	2	5	5	3	3	5	6	1	6	3	5	5	4	3	2	5	3	3	5	3	4	2	6	4	5	4	3	4	3	3	5	4	4	6	5	3	3	4	6	3	5	4	3	5
325	6	6	6	6	6	6	6	6	6	6	6	6	1	6	6	6	6	6	6	1	6	6	6	6	6	6	6	6	1	6	6	6	6	6	6	6	6	6	6	6	6	6	6	1	6	6	6	6	6
326	6	6	6	6	6	6	6	6	2	5	5	6	1	6	6	6	6	6	6	1	5	6	6	6	6	6	5	6	1	5	6	6	6	6	6	6	6	6	6	6	6	6	6	1	6	6	6	6	6
327	4	5	6	4	4	3	5	5	2	2	5	2	1	6	3	5	5	2	2	5	5	3	5	5	2	3	2	6	5	5	5	2	5	2	2	2	5	2	6	4	2	2	5	5	2	2	2	2	5
328	4	5	4	2	4	4	3	6	5	3	3	4	1	6	5	6	4	4	6	1	3	4	6	5	6	6	2	4	1	4	6	6	5	6	6	6	2	6	6	6	6	6	1	1	6	6	6	6	6
329	1	6	6	2	4	4	6	6	5	3	3	4	1	4	6	3	3	4	6	1	3	3	3	6	5	6	2	5	1	4	6	6	3	6	6	4	1	6	4	4	4	4	1	1	6	6	6	5	3
330	6	6	6	6	6	6	6	6	6	6	6	6	1	6	6	6	6	6	6	1	1	6	6	6	6	6	6	6	1	6	6	6	6	6	6	6	3	6	6	6	6	6	1	1	6	6	6	6	6
331	3	6	3	3	5	5	3	6	4	3	2	4	1	6	5	3	3	5	6	1	3	4	6	6	6	4	3	5	1	4	6	6	6	6	6	6	2	6	6	6	6	6	1	1	6	6	6	6	3
332	6	6	6	6	6	6	6	1	1	6	6	6	6	6	6	6	6	6	6	1	6	6	6	6	6	6	6	6	1	6	6	6	6	6	6	6	1	6	6	6	6	6	6	1	6	6	6	6	6
333	6	6	6	6	6	6	6	6	1	6	6	6	6	6	6	6	6	6	6	1	6	6	6	6	6	6	6	6	1	6	1	6	6	6	6	6	1	6	6	6	6	6	6	1	6	6	6	6	6
334	6	6	6	6	6	6	6	5	6	6	6	2	6	6	6	6	5	6	6	3	6	2	6	6	6	6	6	6	1	6	6	6	6	6	6	6	2	6	6	6	6	6	6	4	6	6	6	6	6
335	6	6	6	6	6	6	6	6	1	6	6	4	5	6	6	6	6	6	6	2	6	1	6	6	6	6	6	6	1	6	6	6	6	6	6	6	2	5	6	6	6	6	6	3	6	6	6	6	6
336	6	6	6	6	6	6	6	6	6	6	6	1	6	6	6	6	6	6	6	1	6	6	6	6	6	6	6	6	1	6	6	6	6	6	6	6	1	6	6	6	6	6	6	1	6	6	6	6	6
337	6	6	6	6	6	6	6	6	6	2	6	1	1	6	6	6	6	6	6	1	6	1	6	6	3	6	1	6	1	6	6	6	6	6	6	6	4	6	6	6	6	6	6	5	6	6	6	6	6
338	6	6	6	6	6	6	6	6	1	5	6	5	1	6	6	6	6	6	6	2	6	1	6	6	6	6	2	6	1	6	6	5	6	5	6	6	2	5	6	1	6	6	6	3	6	6	6	6	6
339	6	6	6	6	6	6	6	6	6	6	6	6	6	6	6	6	6	6	6	1	6	6	6	6	6	6	3	6	4	6	6	6	6	6	6	6	6	6	6	6	6	1	6	4	6	6	6	6	6
340	6	6	6	6	6	6	6	6	1	6	6	1	4	6	6	6	6	6	6	3	6	1	6	6	6	6	6	6	6	6	6	6	6	6	6	6	3	6	6	6	6	6	4	3	6	6	6	6	6
341	6	1	6	6	6	6	6	6	6	6	6	6	6	6	6	6	6	6	6	1	6	6	6	6	6	6	6	6	1	6	6	6	6	6	6	6	6	6	6	6	6	6	1	6	6	6	6	6	6
342	3	2	3	3	1	1	1	1	1	4	3	6	1	4	1	3	1	4	4	3	3	4	3	3	4	6	4	1	3	3	3	4	3	4	4	6	1	6	6	6	6	6	1	1	4	6	4	4	5
343	6	1	1	1	1	6	1	1	6	6	1	6	6	6	6	1	1	6	6	1	1	6	1	1	6	6	6	1	1	1	1	6	1	6	6	6	1	6	6	1	6	6	1	1	6	6	6	6	1
344	5	5	2	3	3	4	3	3	4	4	5	5	5	4	4	3	3	4	4	2	5	5	5	5	4	4	4	3	3	3	3	4	3	5	5	5	2	4	4	6	4	4	3	3	4	4	5	5	2
345	6	6	6	6	6	6	6	6	1	6	6	3	1	6	6	6	6	6	6	2	6	1	6	6	6	6	5	6	1	6	6	6	6	6	6	6	2	5	6	6	6	6	6	3	6	6	6	6	6
346	3	5	6	6	1	6	6	5	2	6	1	3	6	1	6	6	1	1	2	1	1	3	4	4	3	6	6	6	1	5	6	1	4	3	6	6	6	6	6	6	2	6	1	1	2	5	6	6	5
347	3	4	4	4	4	3	4	4	3	3	4	3	3	3	3	4	4	3	3	4	4	3	4	4	3	3	3	4	4	4	4	3	4	3	3	3	4	3	3	4	3	3	4	4	3	3	3	3	4
348	5	4	3	4	5	5	4	3	4	4	4	3	3	6	2	3	5	4	2	4	5	3	4	4	4	6	3	4	4	5	6	3	4	3	5	4	3	5	6	6	6	3	3	3	4	2	3	3	4
349	6	1	1	1	1	6	1	1	6	6	1	6	6	6	6	1	1	6	6	1	1	6	1	1	6	6	6	1	1	1	1	6	1	6	6	6	1	6	6	1	6	6	1	1	6	6	6	6	1
350	6	6	6	6	6	6	6	6	6	6	6	6	6	6	6	6	6	6	6	1	6	6	6	6	6	6	3	6	4	6	6	6	6	6	6	6	6	6	6	6	6	1	6	4	6	6	6	6	6
351	6	6	6	6	6	6	6	6	1	6	6	1	4	6	6	6	6	6	6	3	6	1	6	6	6	6	6	6	6	6	6	6	6	6	6	6	3	6	6	6	6	6	4	3	6	6	6	6	6
352	6	1	6	6	6	6	6	6	6	6	6	6	6	6	6	6	6	6	6	1	6	6	6	6	6	6	6	6	1	6	6	6	6	6	6	6	6	6	6	6	6	6	1	6	6	6	6	6	6
353	3	2	3	3	1	1	1	1	1	4	3	6	1	4	1	3	1	4	4	3	3	4	3	3	4	6	4	1	3	3	3	4	3	4	4	6	1	6	6	6	6	6	1	1	4	6	4	4	5
354	6	1	1	1	1	6	1	1	6	6	1	6	6	6	6	1	1	6	6	1	1	6	1	1	6	6	6	1	1	1	1	6	1	6	6	6	1	6	6	1	6	6	1	1	6	6	6	6	1
355	5	5	2	3	3	4	3	3	4	4	5	5	5	4	4	3	3	4	4	2	5	5	5	5	4	4	4	3	3	3	3	4	3	5	5	5	2	4	4	6	4	4	3	3	4	4	5	5	2
356	6	6	6	6	6	6	6	6	1	6	6	3	1	6	6	6	6	6	6	2	6	1	6	6	6	6	5	6	1	6	6	6	6	6	6	6	2	5	6	6	6	6	6	3	6	6	6	6	6
357	3	5	6	6	1	6	6	5	2	6	1	3	6	1	6	6	1	1	2	1	1	3	4	4	3	6	6	6	1	5	6	1	4	3	6	6	6	6	6	6	2	6	1	1	2	5	6	6	5
358	3	4	4	4	4	3	4	4	3	3	4	3	3	3	3	4	4	3	3	4	4	3	4	4	3	3	3	4	4	4	4	3	4	3	3	3	4	3	3	4	3	3	4	4	3	3	3	3	4
359	5	4	3	4	5	5	4	3	4	4	4	3	3	6	2	3	5	4	2	4	5	3	4	4	4	6	3	4	4	5	6	3	4	3	5	4	3	5	6	6	6	3	3	3	4	2	3	3	4
360	6	1	1	1	1	6	1	1	6	6	1	6	6	6	6	1	1	6	6	1	1	6	1	1	6	6	6	1	1	1	1	6	1	6	6	6	1	6	6	1	6	6	1	1	6	6	6	6	1
